# Supplementary material for: New 5-Hydroxycoumarin-Based Tyrosyl-DNA Phosphodiesterase I Inhibitors Sensitize Tumor Cell Line to Topotecan
Source: MDPI journal article supplement (doi:10.3390/ijms24119155), 2023-05-23
Supplement: s1 [file s1]

## SUPPLEMENTARY INFORMATION

Figure S1. Cytotoxicity of compounds NMR  $^1\text{H}$  and  $^{13}\text{C}$  spectra of compounds **25**, **30** and **33–38**.

Tables S1 to S3 for the computer aided drug design

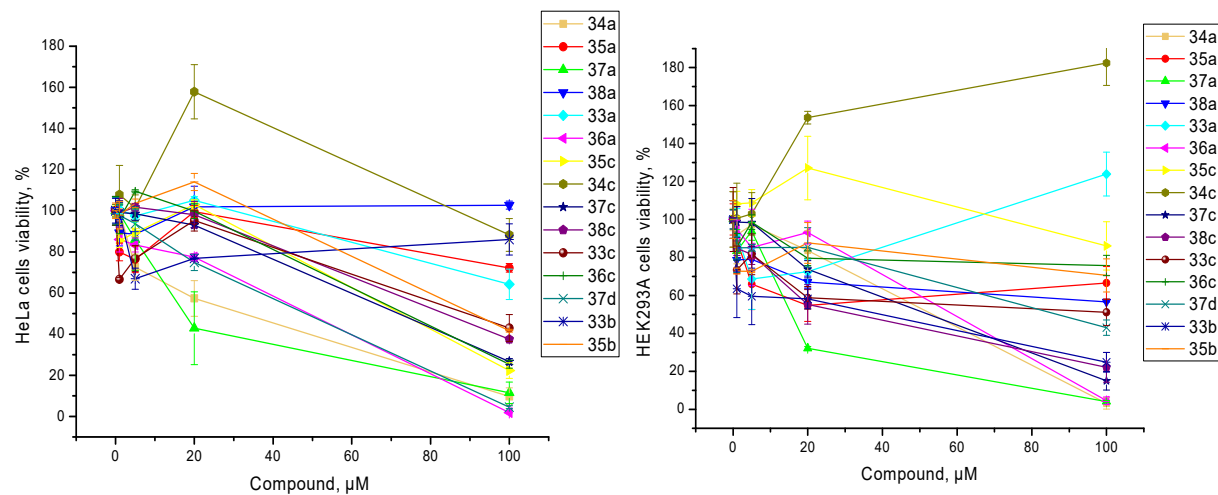

Figure S1. The effect of compounds on the survival of HeLa (**left**) and HEK293A (**right**) cells.

Compound **25**

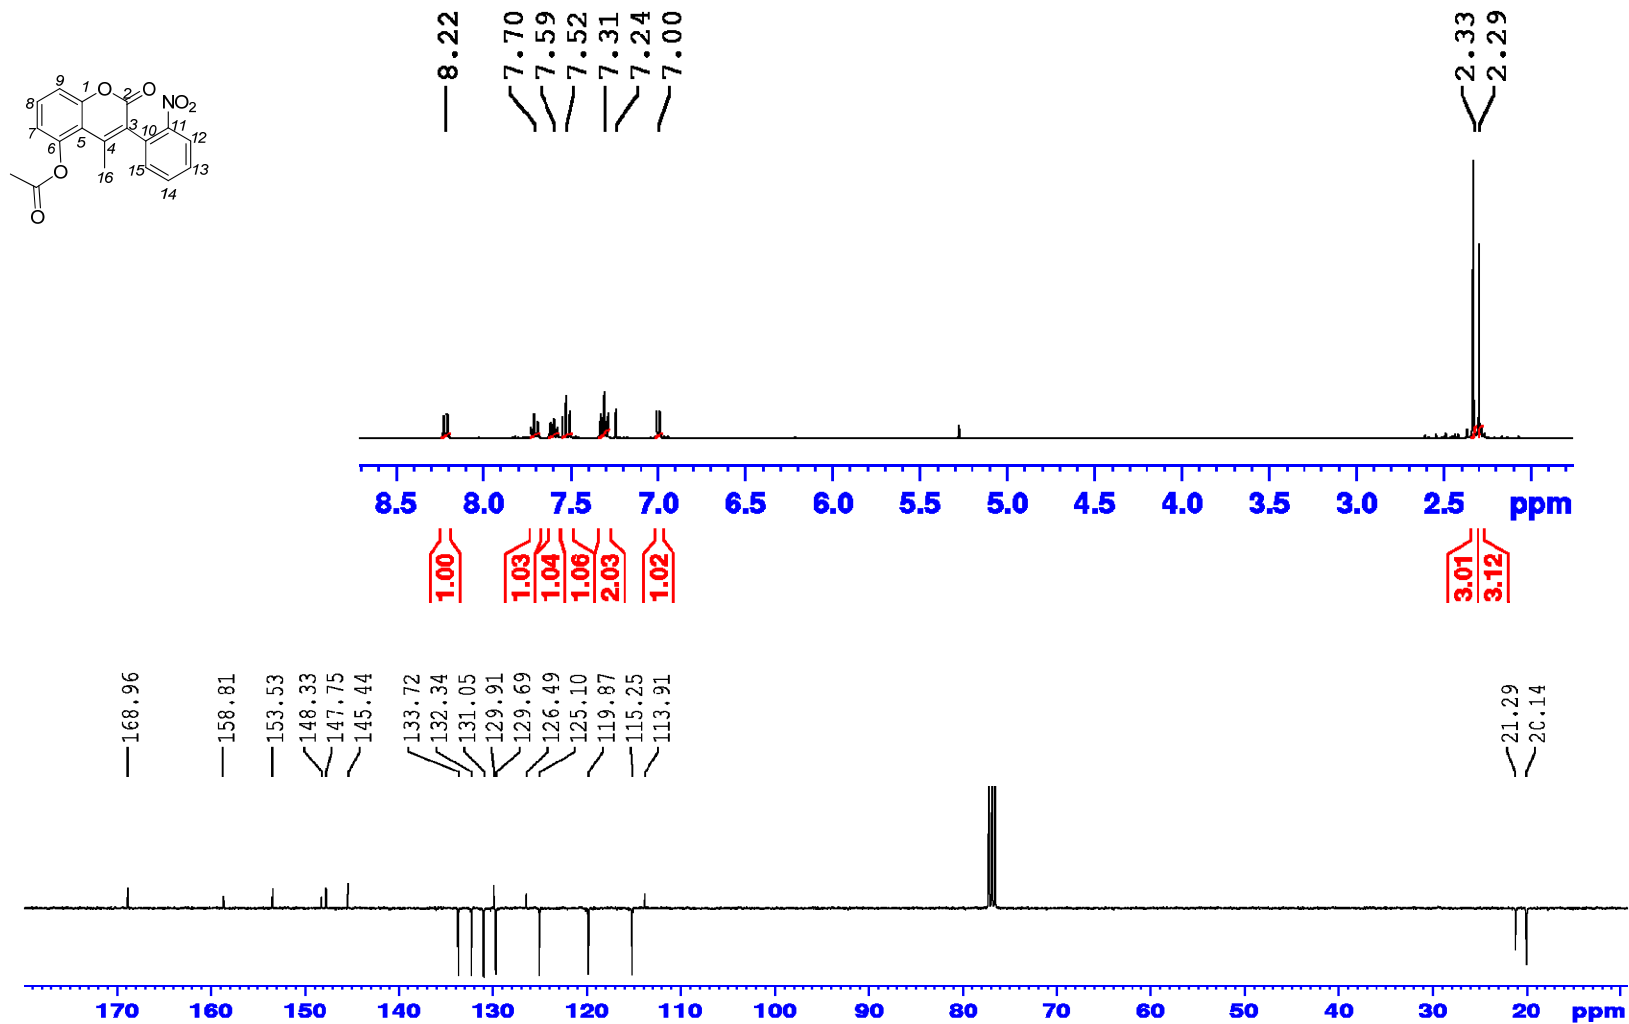

Compound **30**

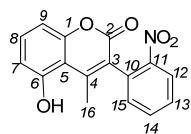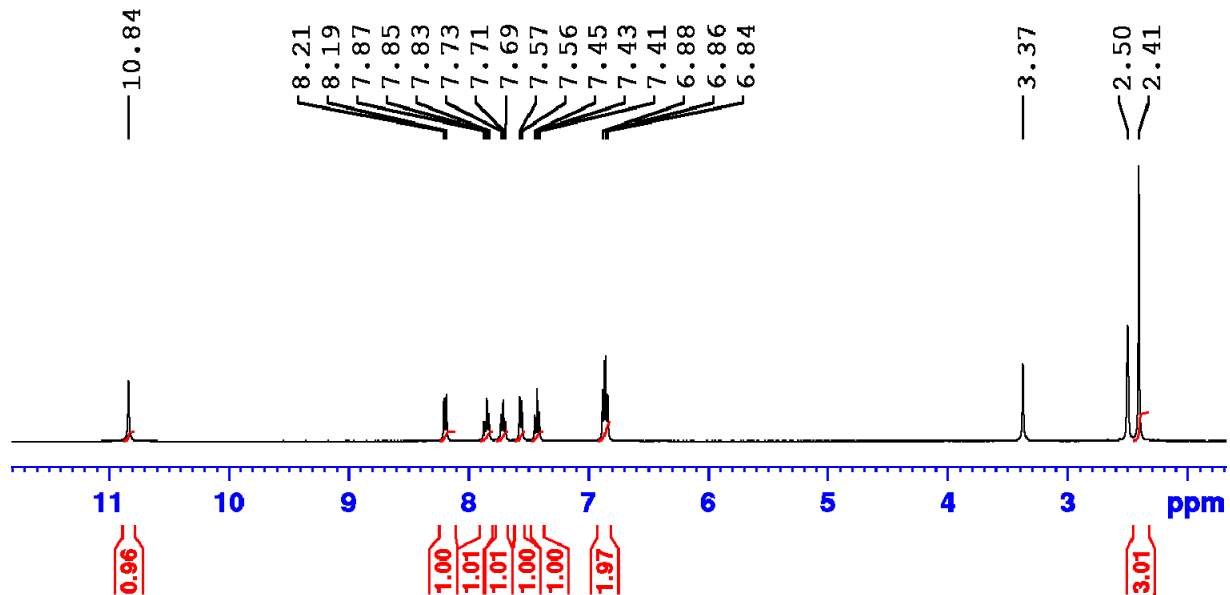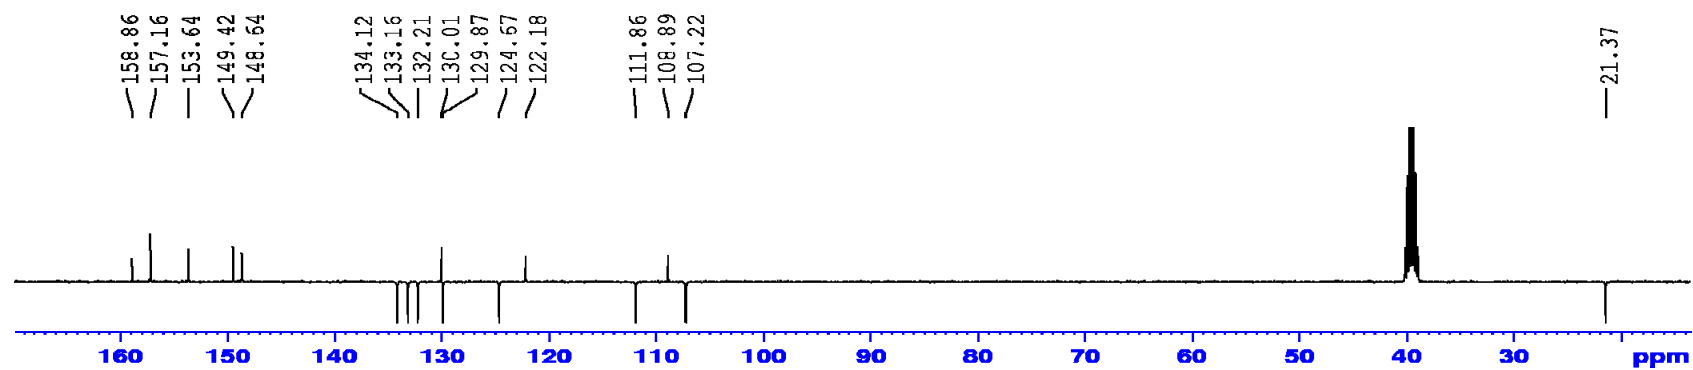

Compound **33a**

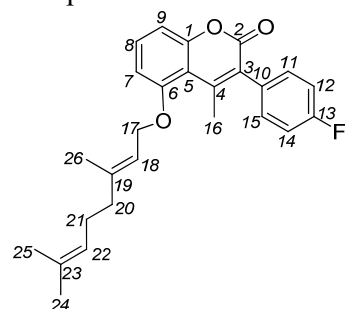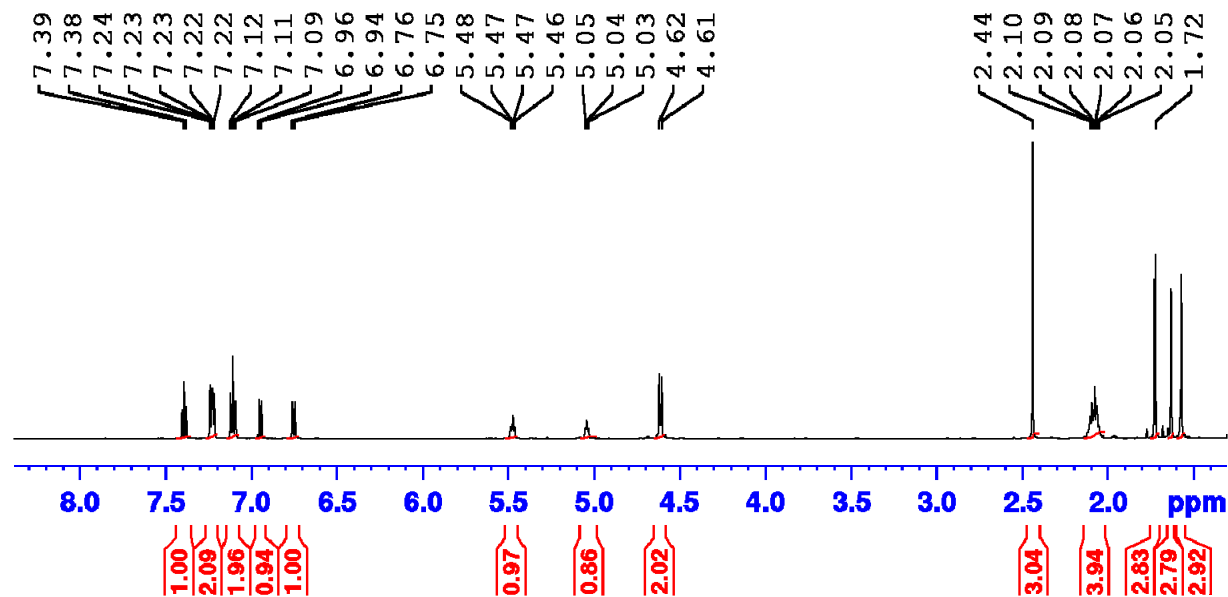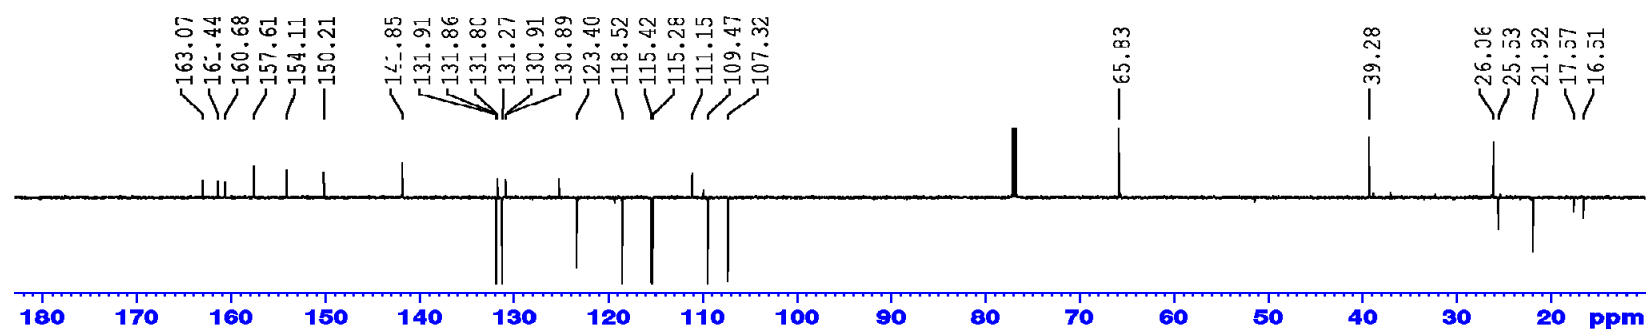

Compound **33b**

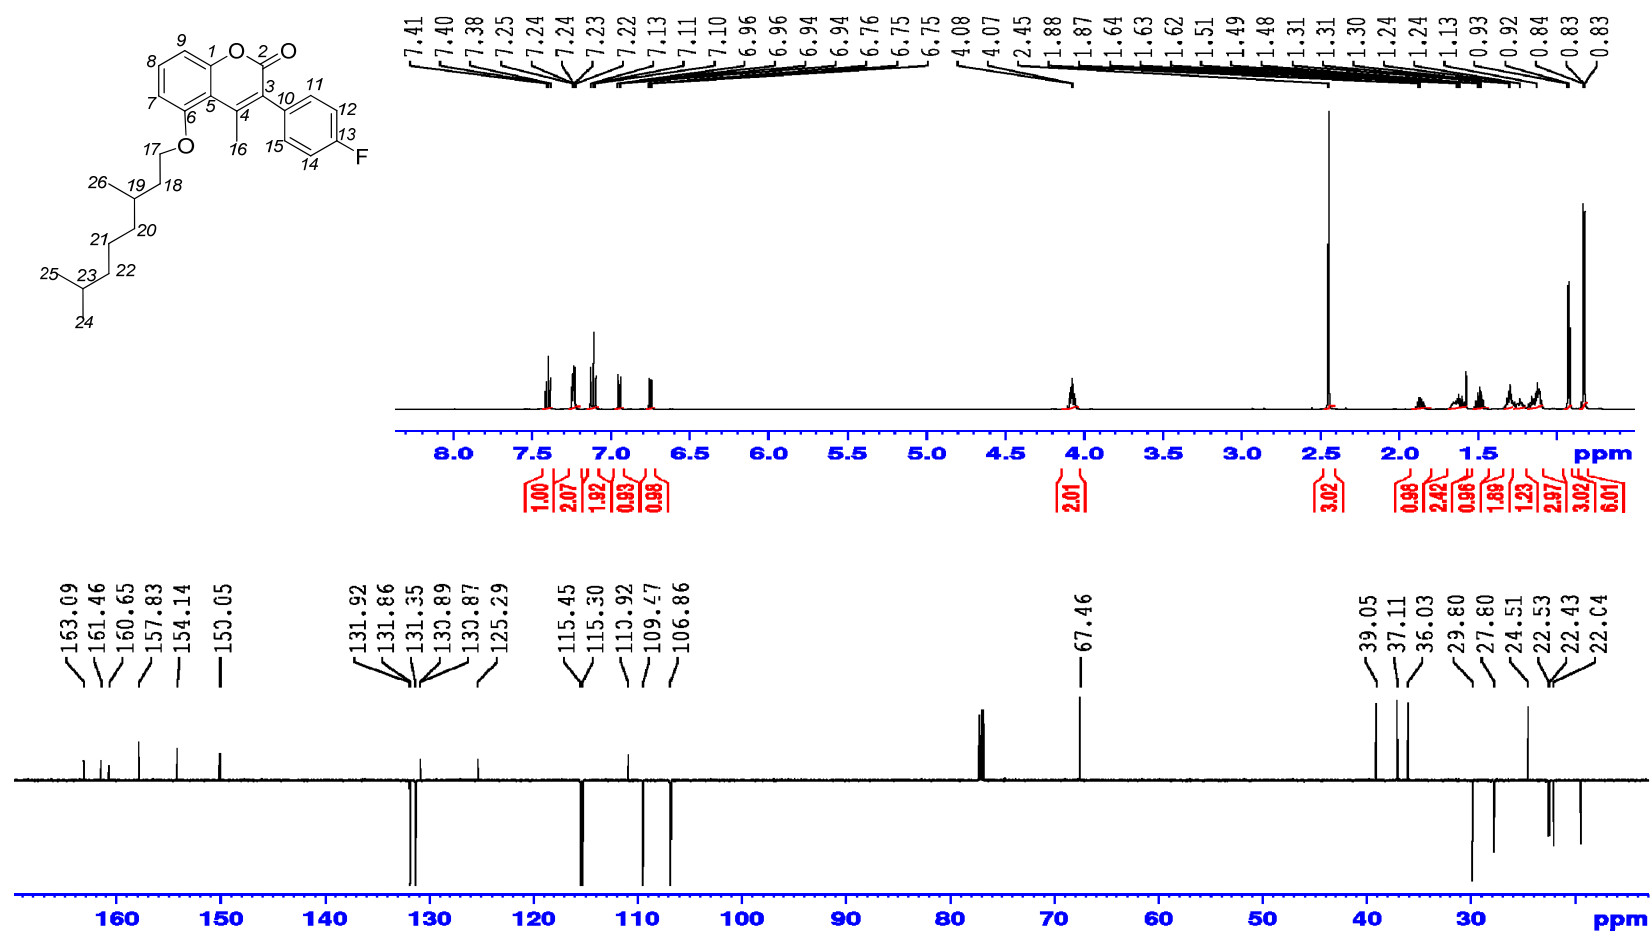

Compound **33c**

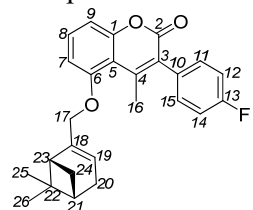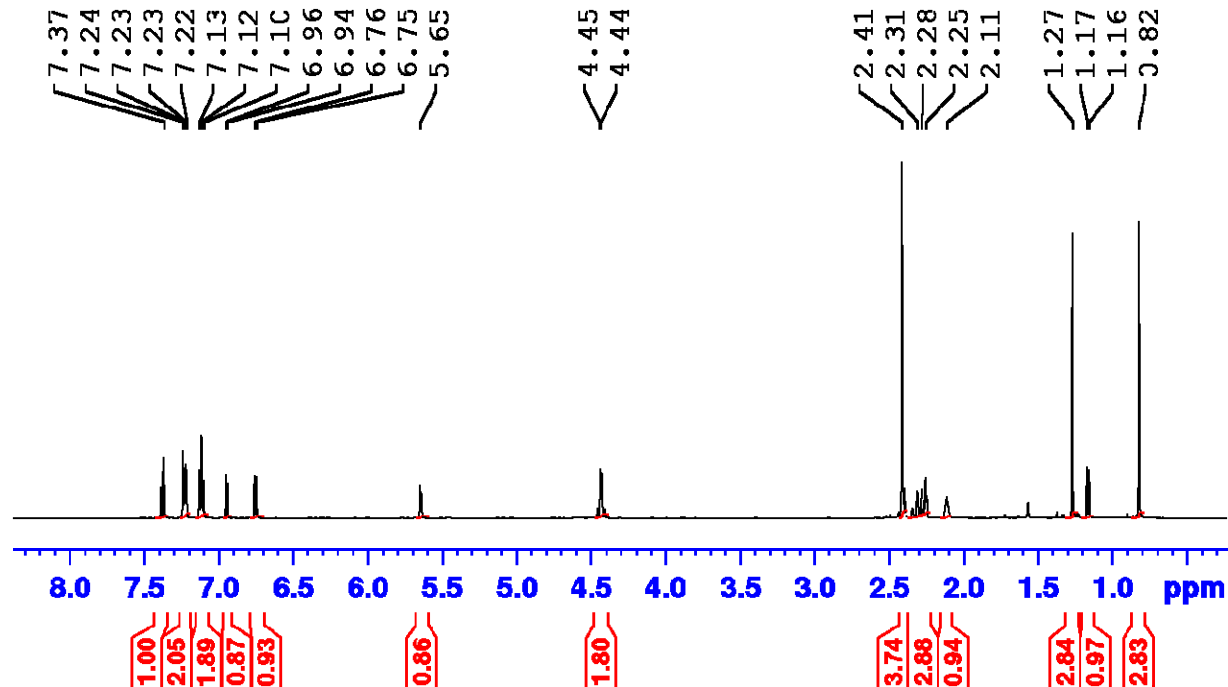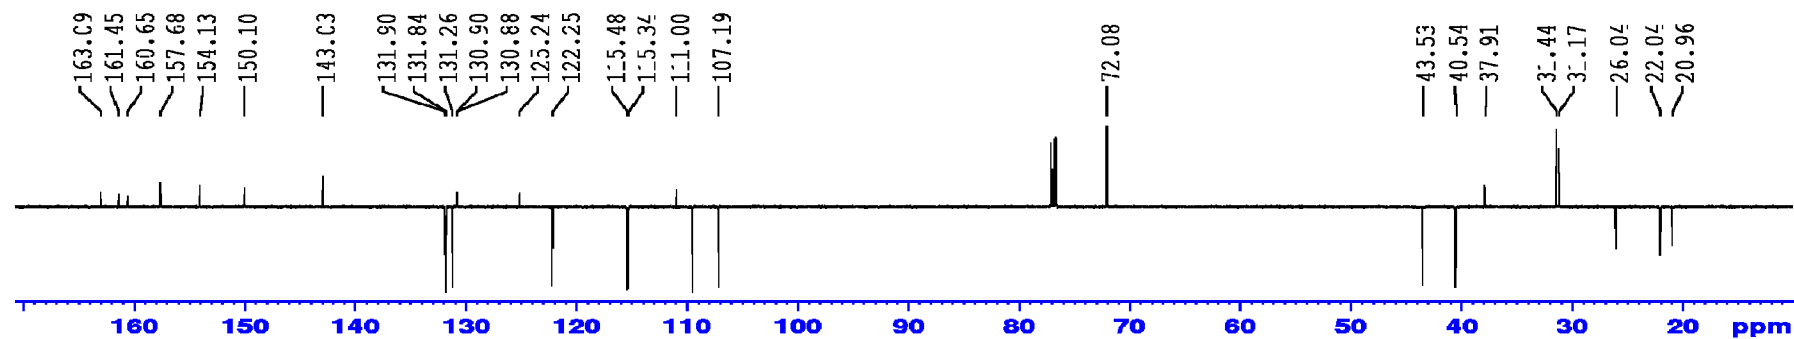

Compound **33d**

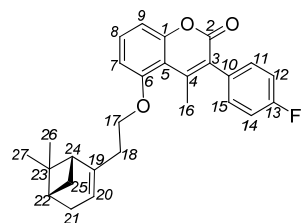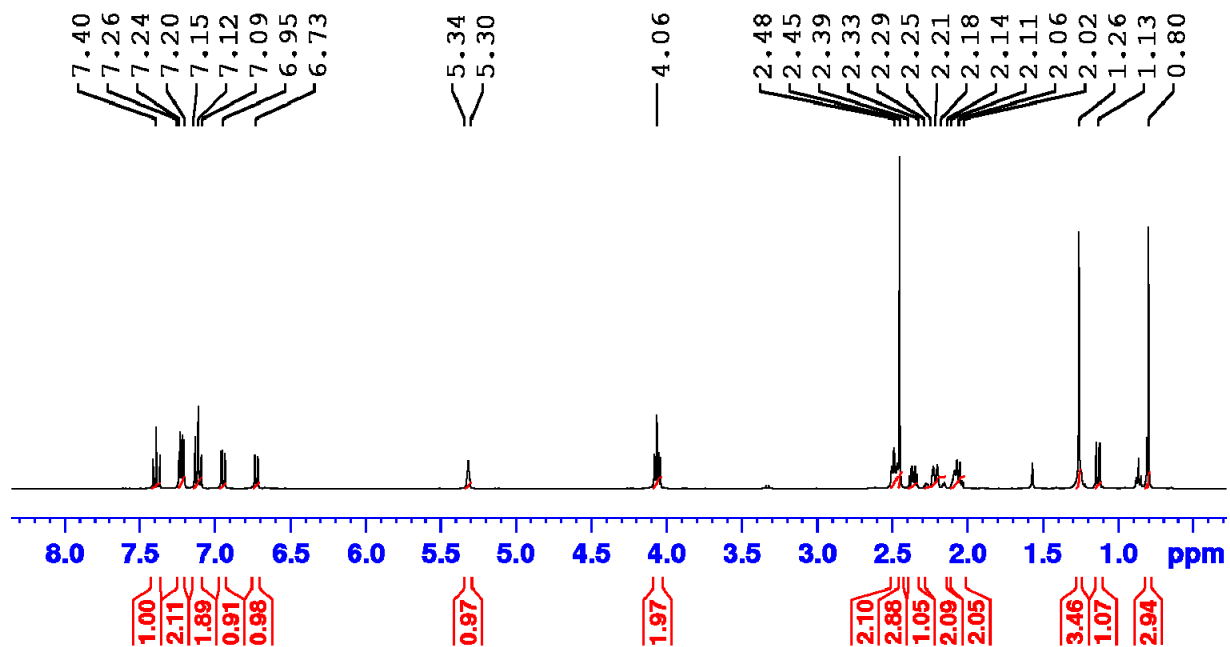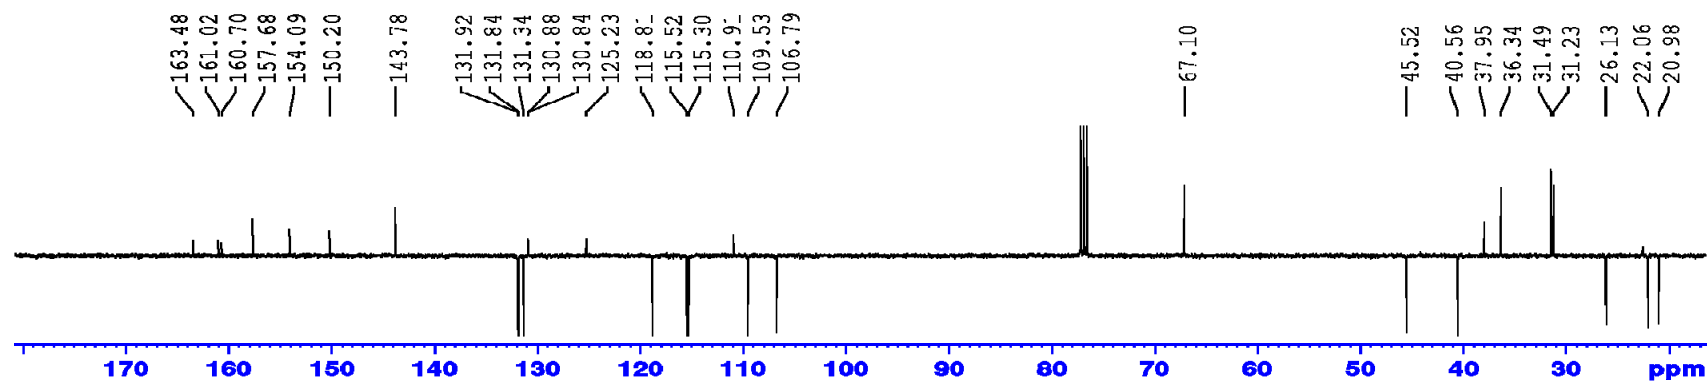



Compound **34a**

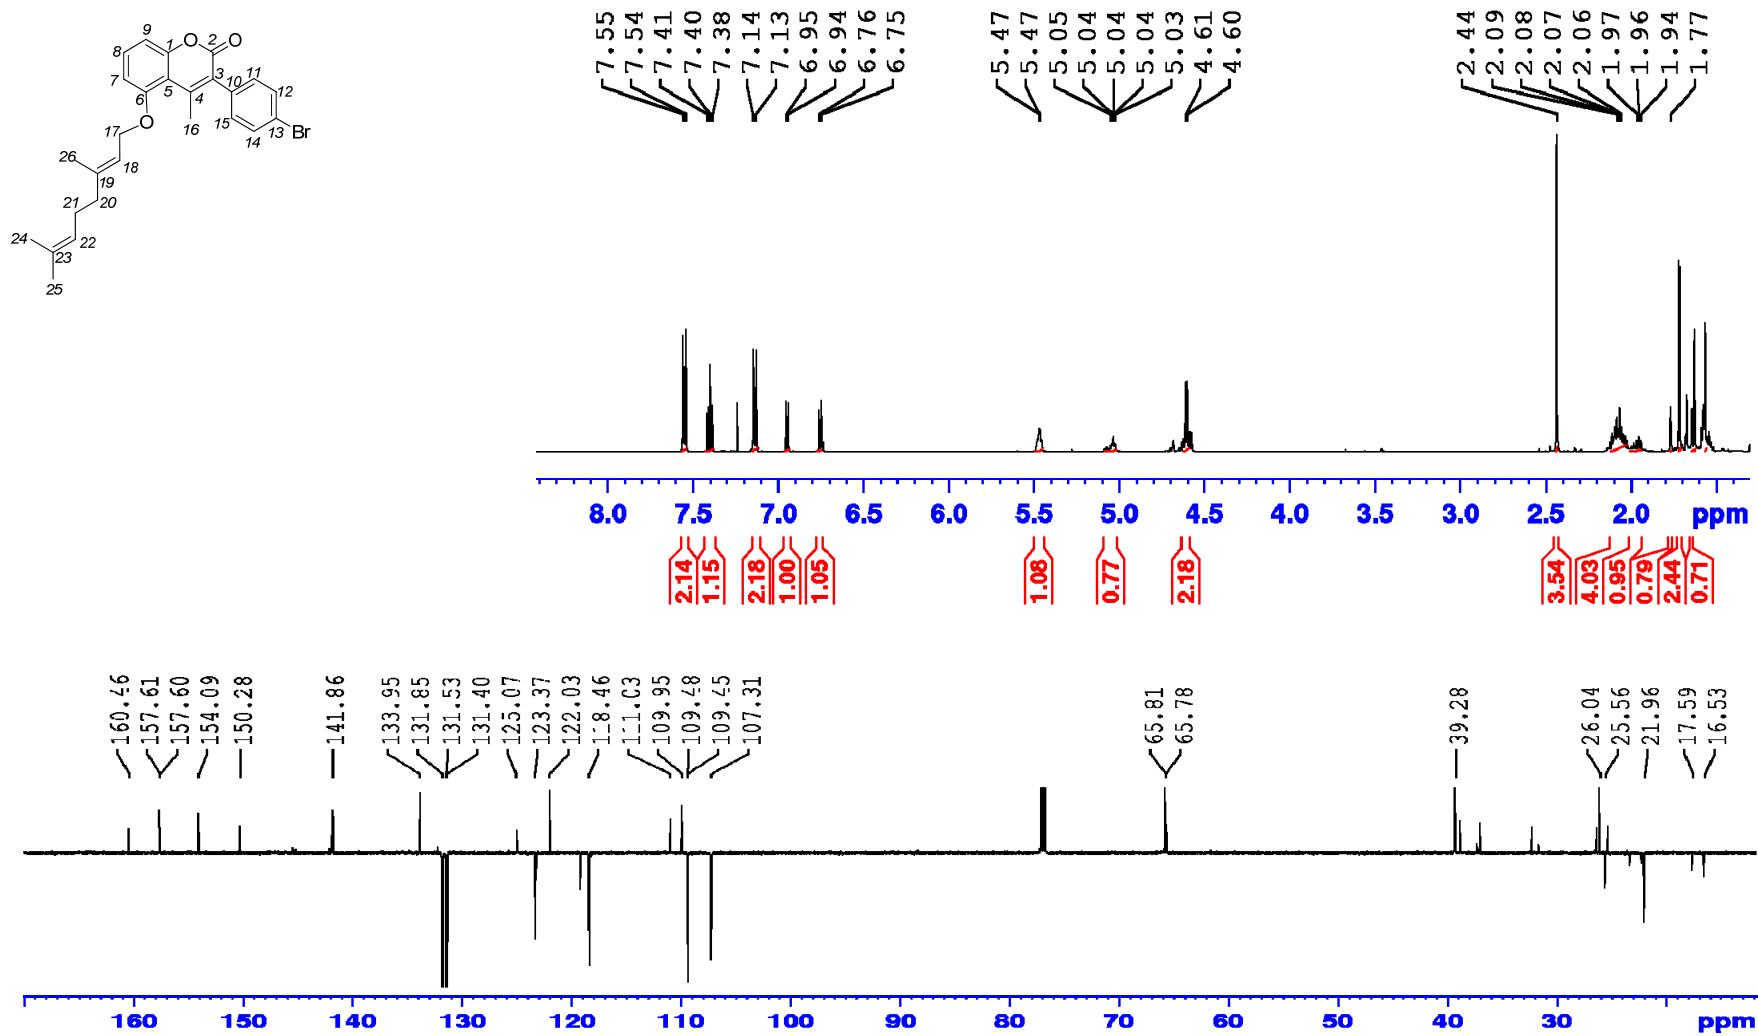

Compound **34b**

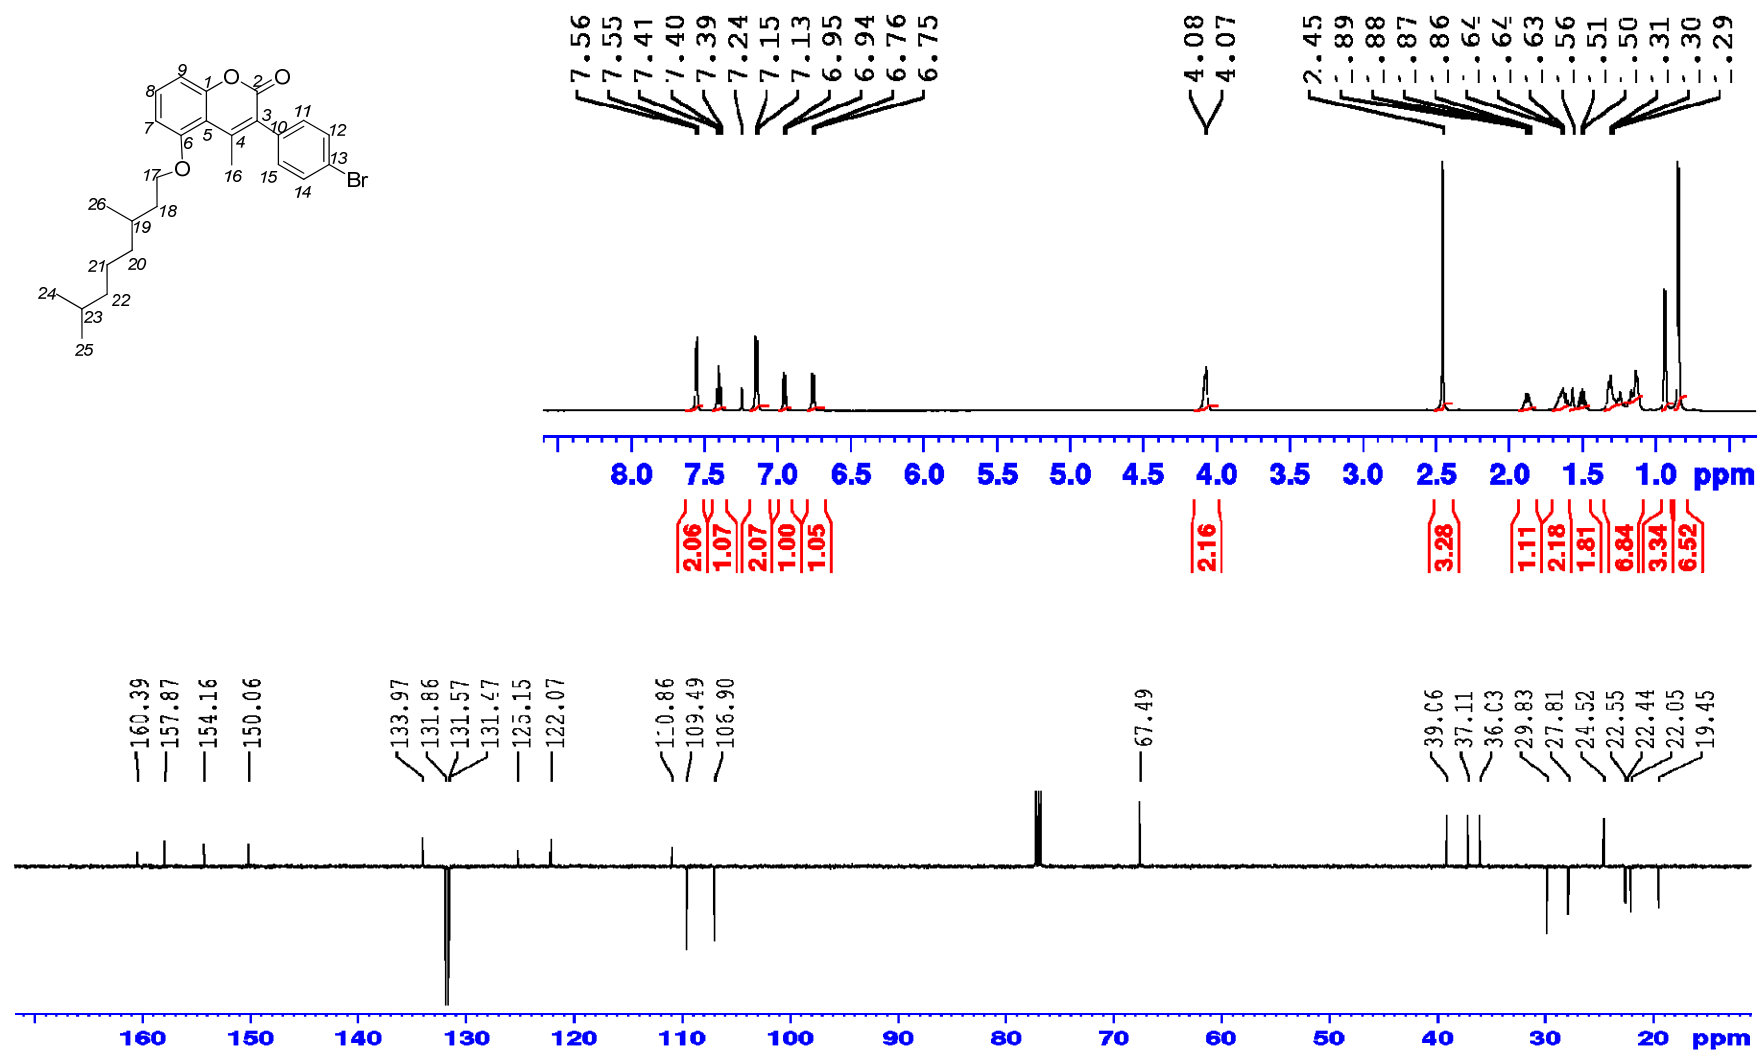

Compound **34c**

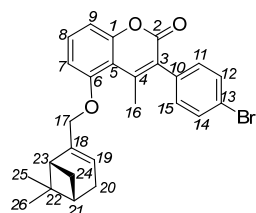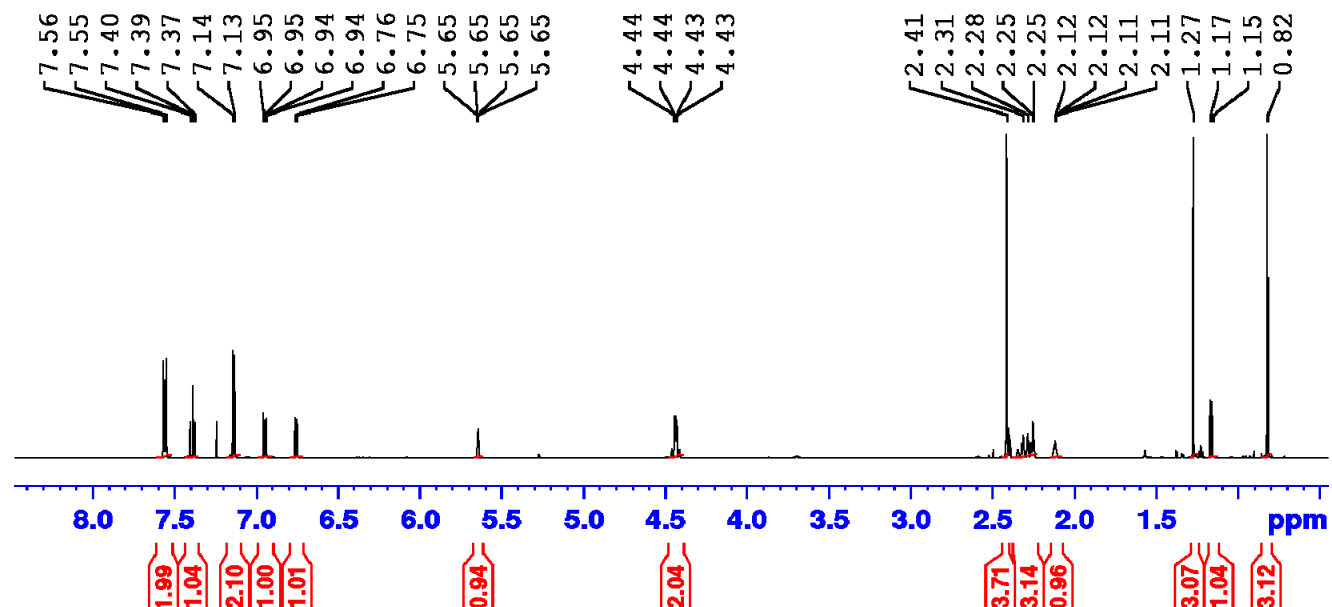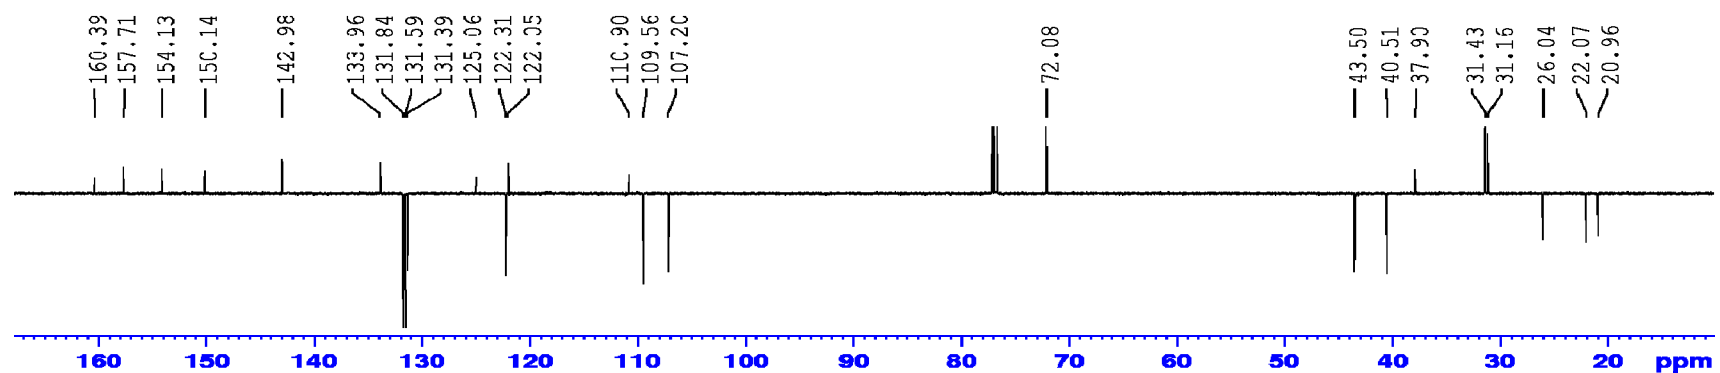

Compound **35a**

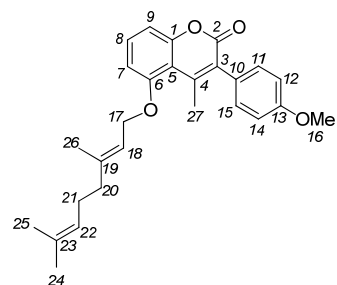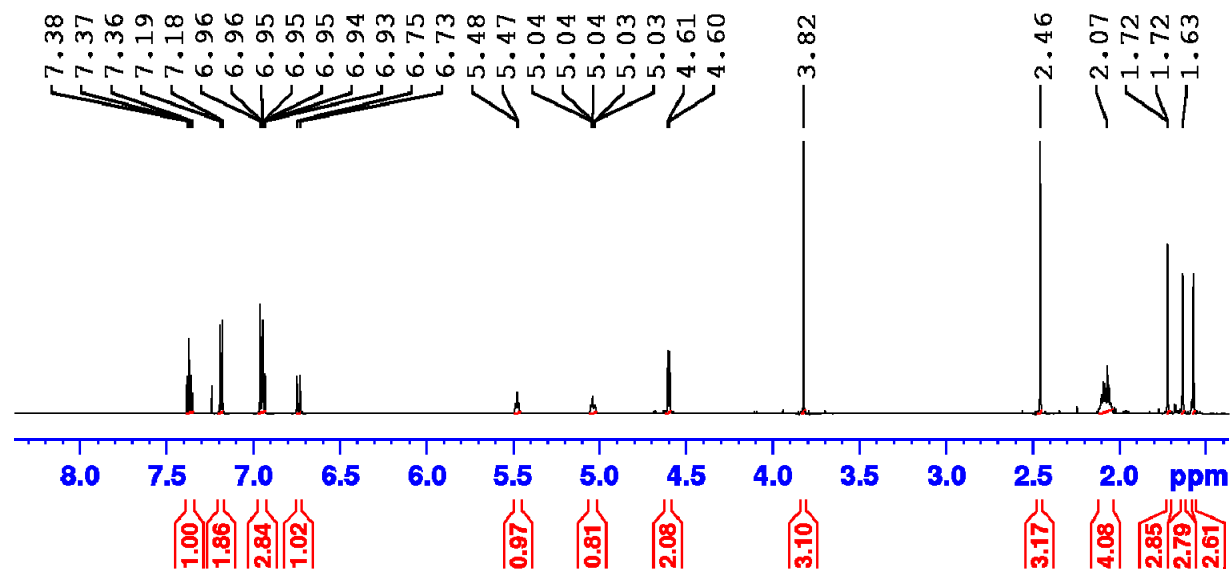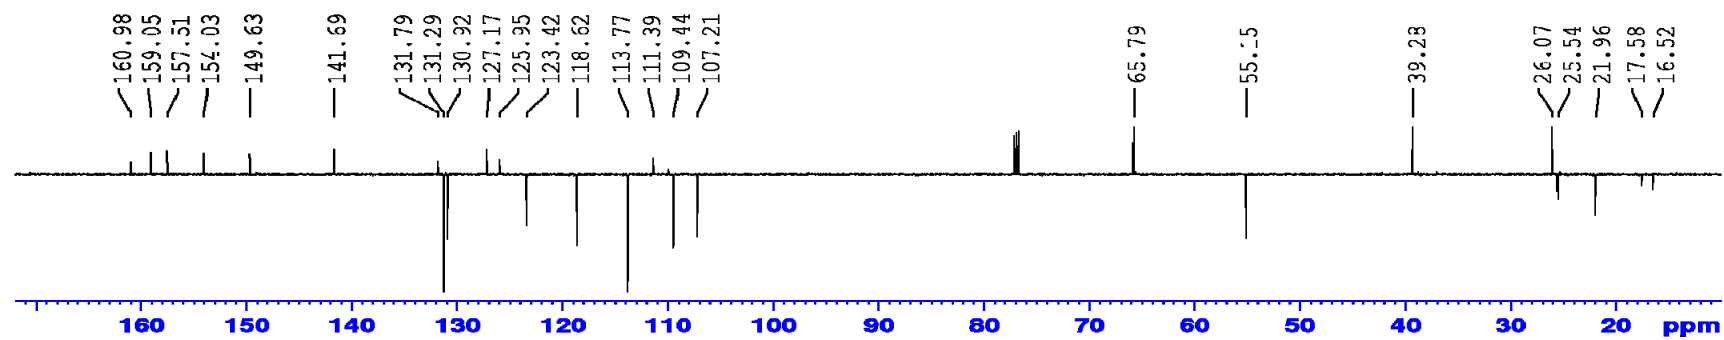

### Compound 35b

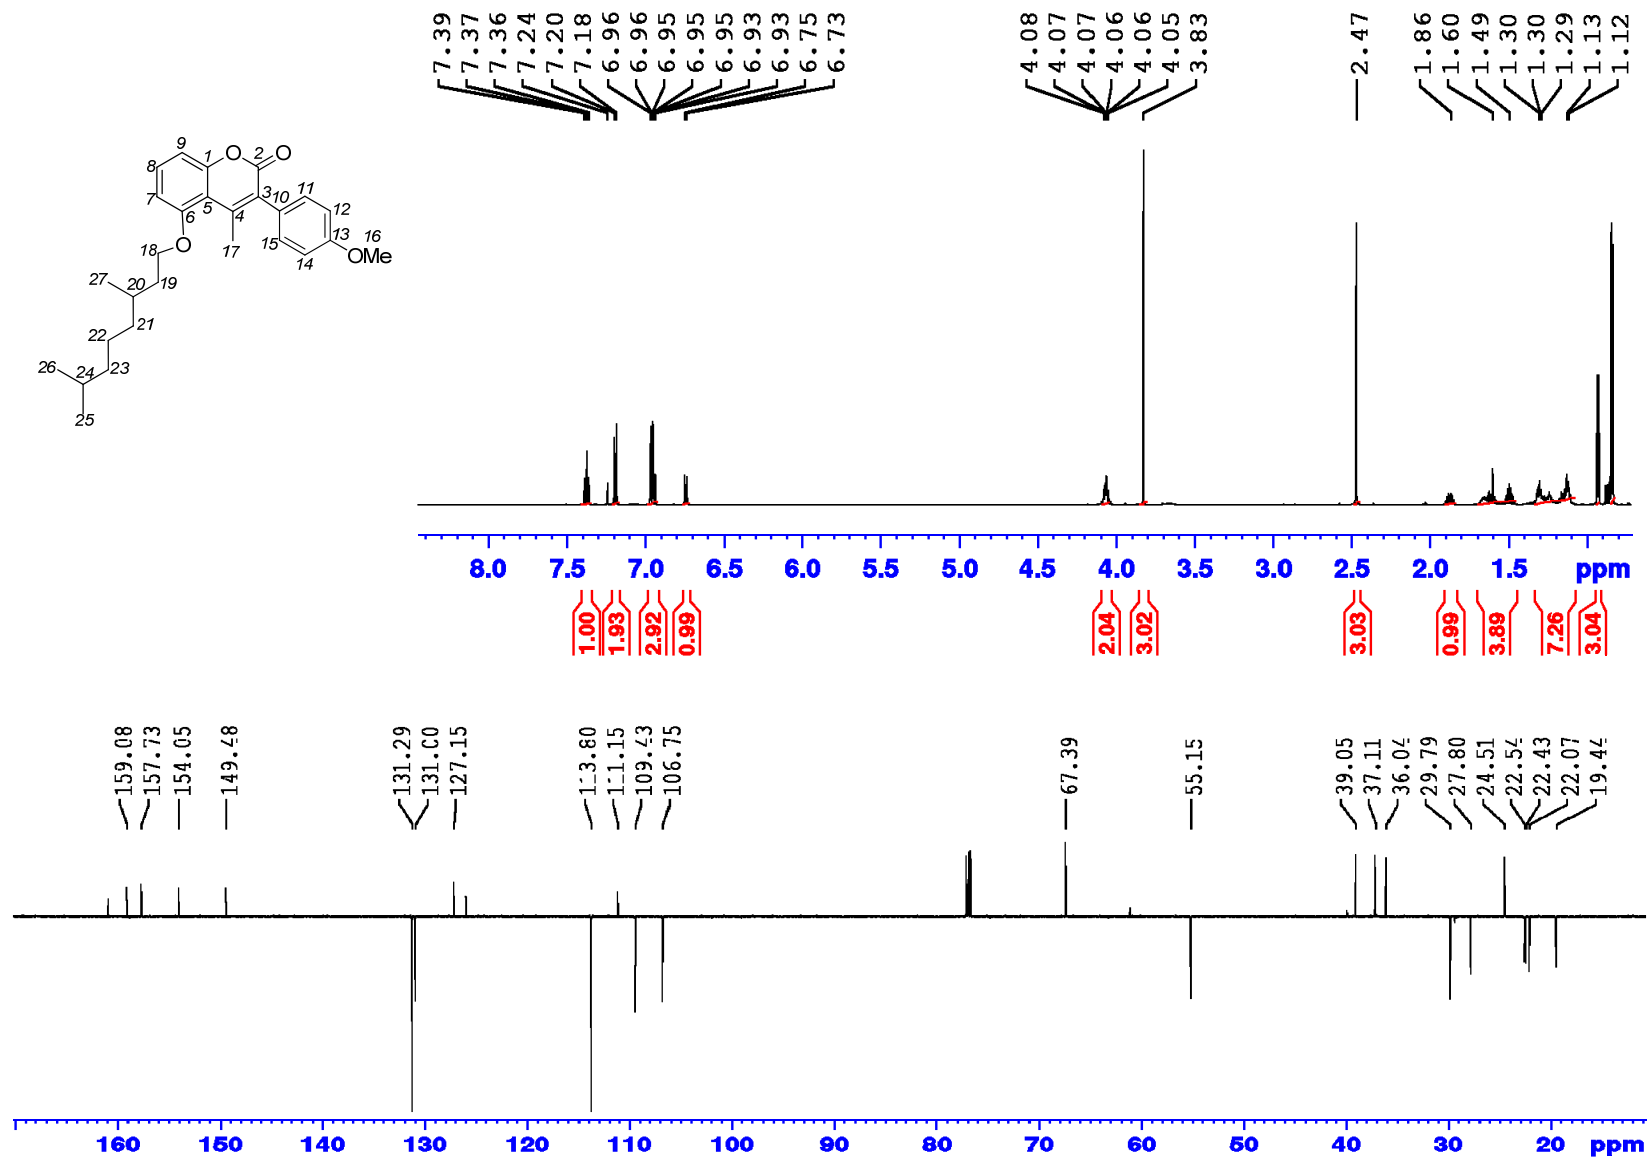

Compound **35c**

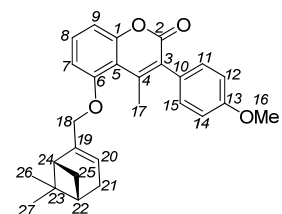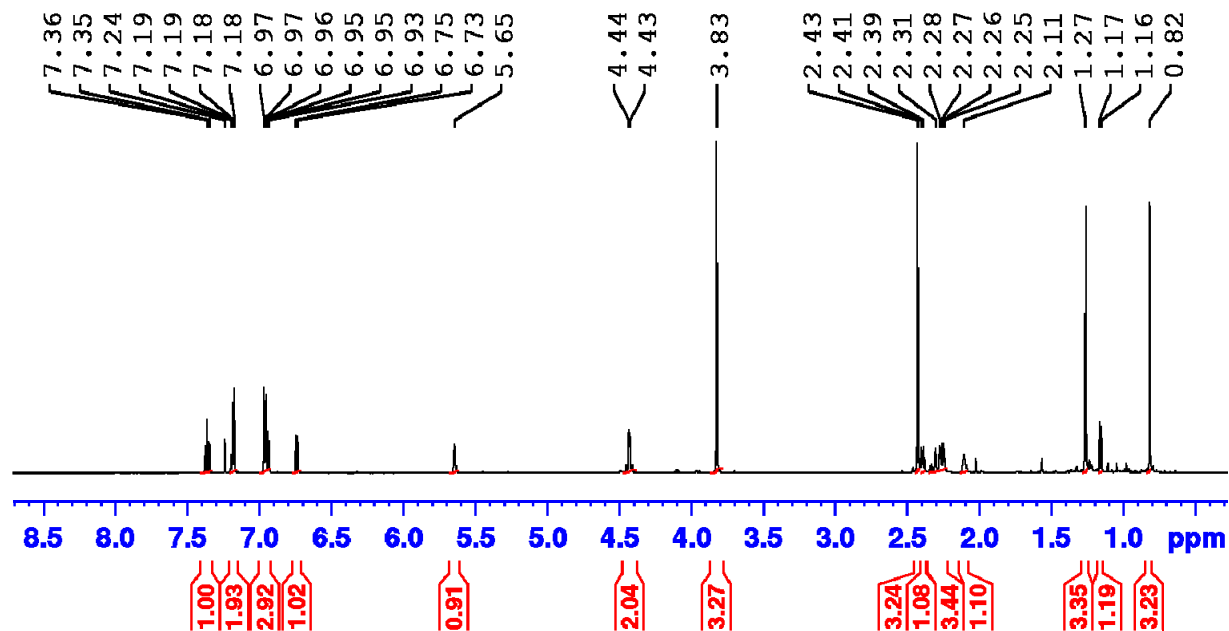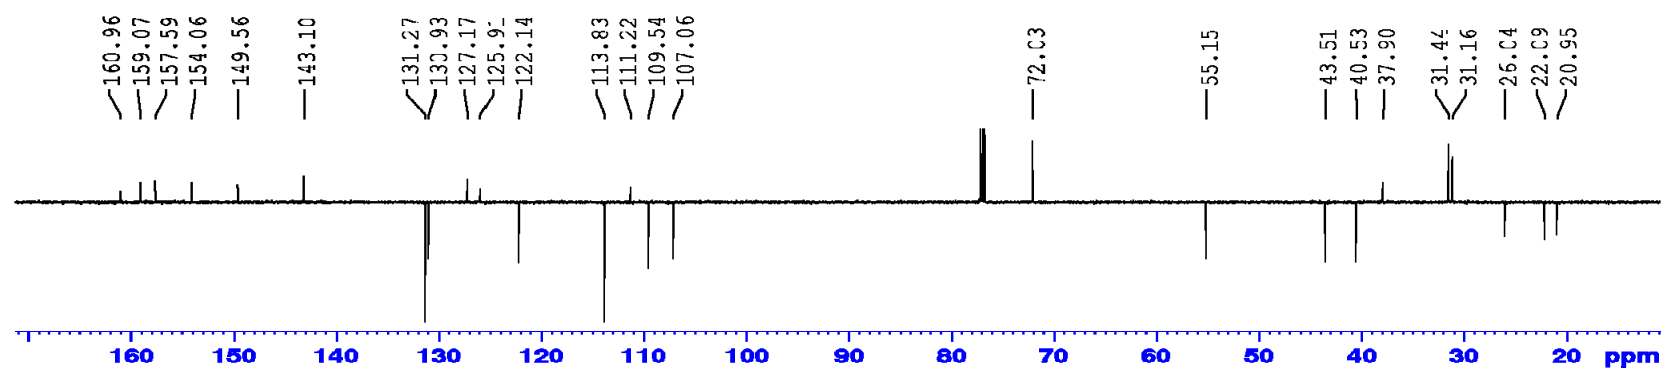

Compound **36a**

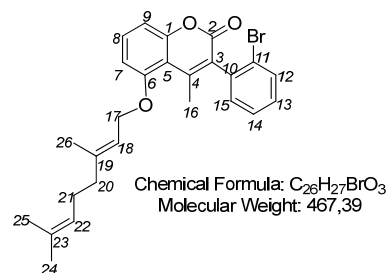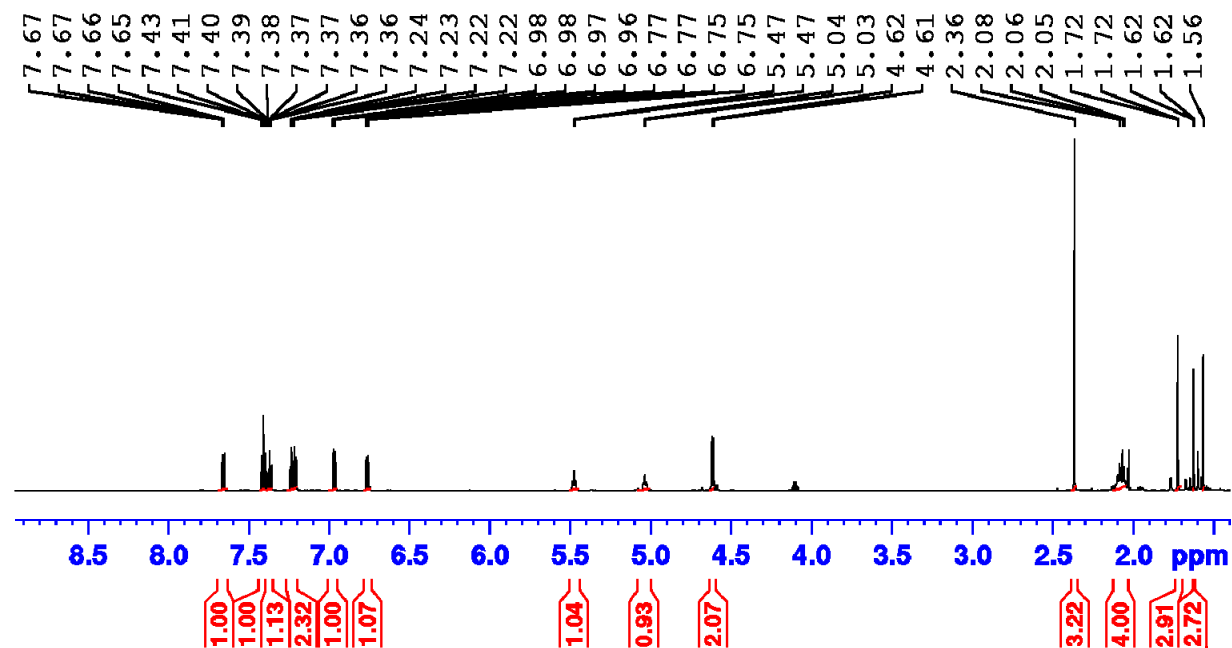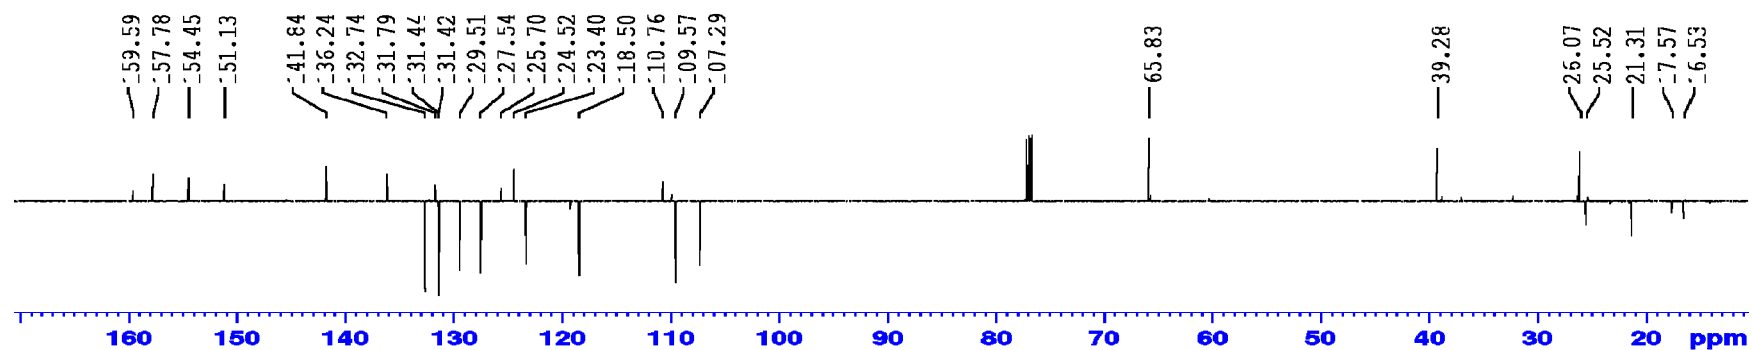

Compound **36b**

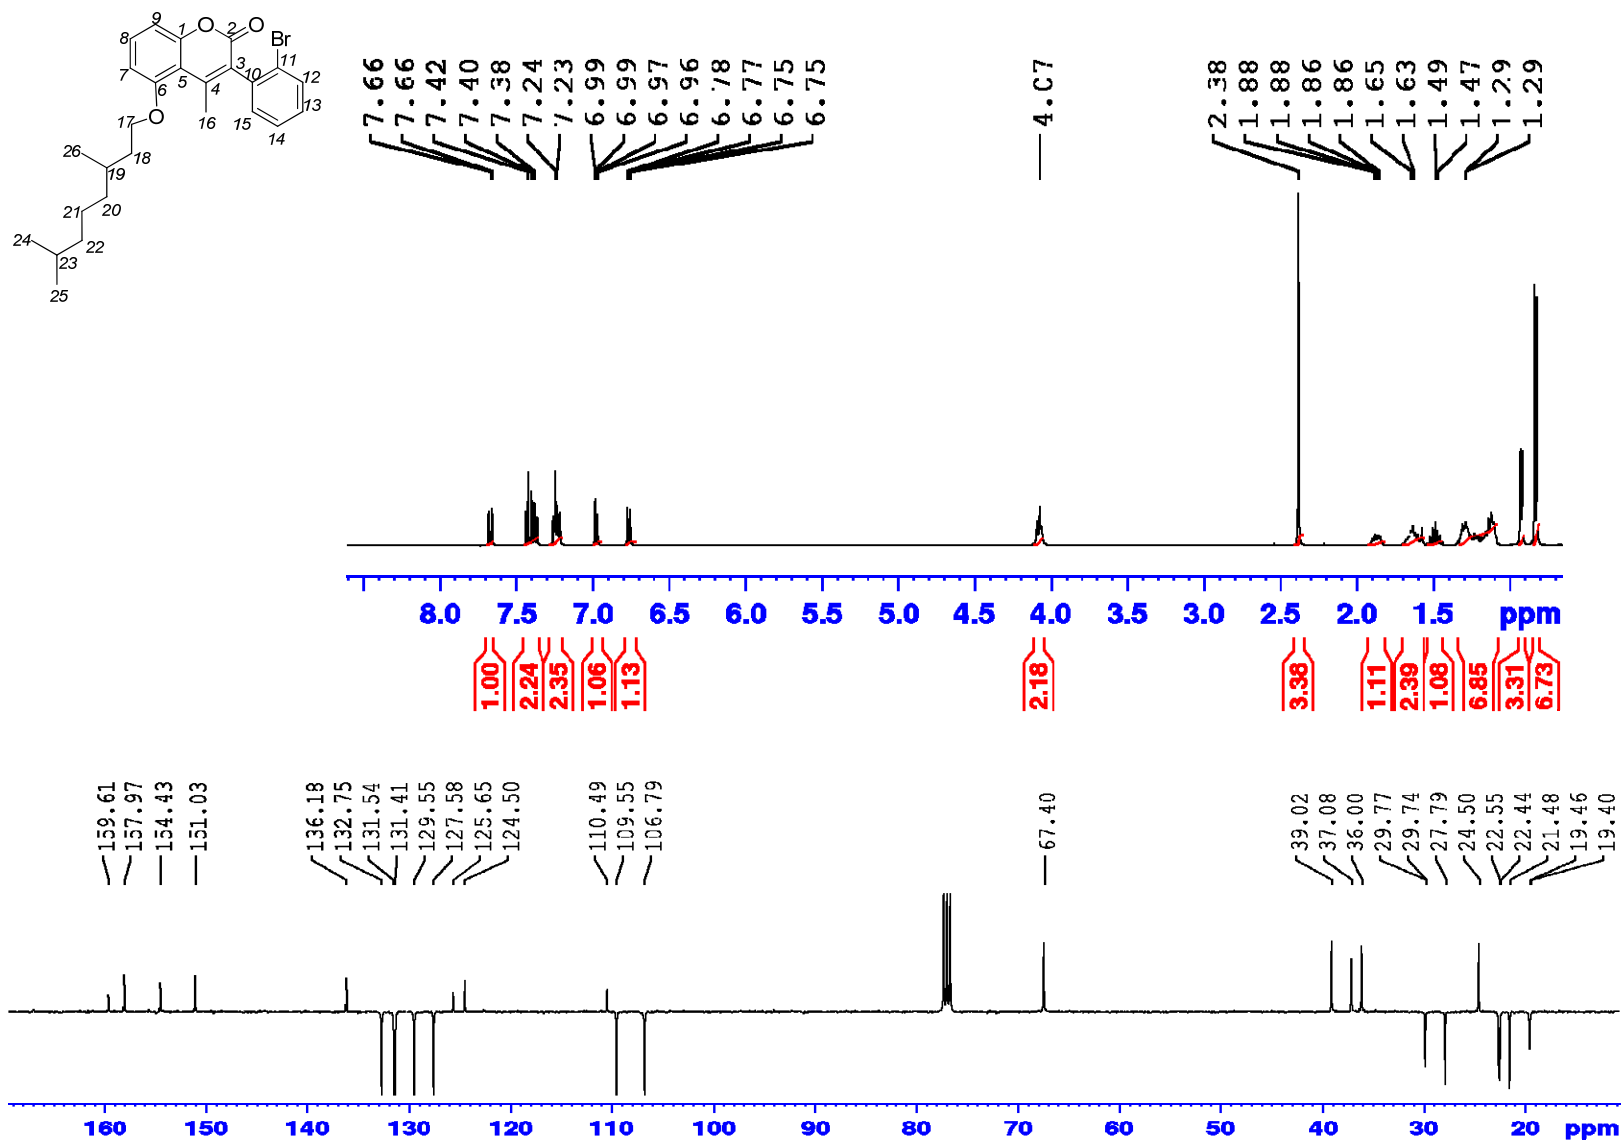



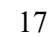

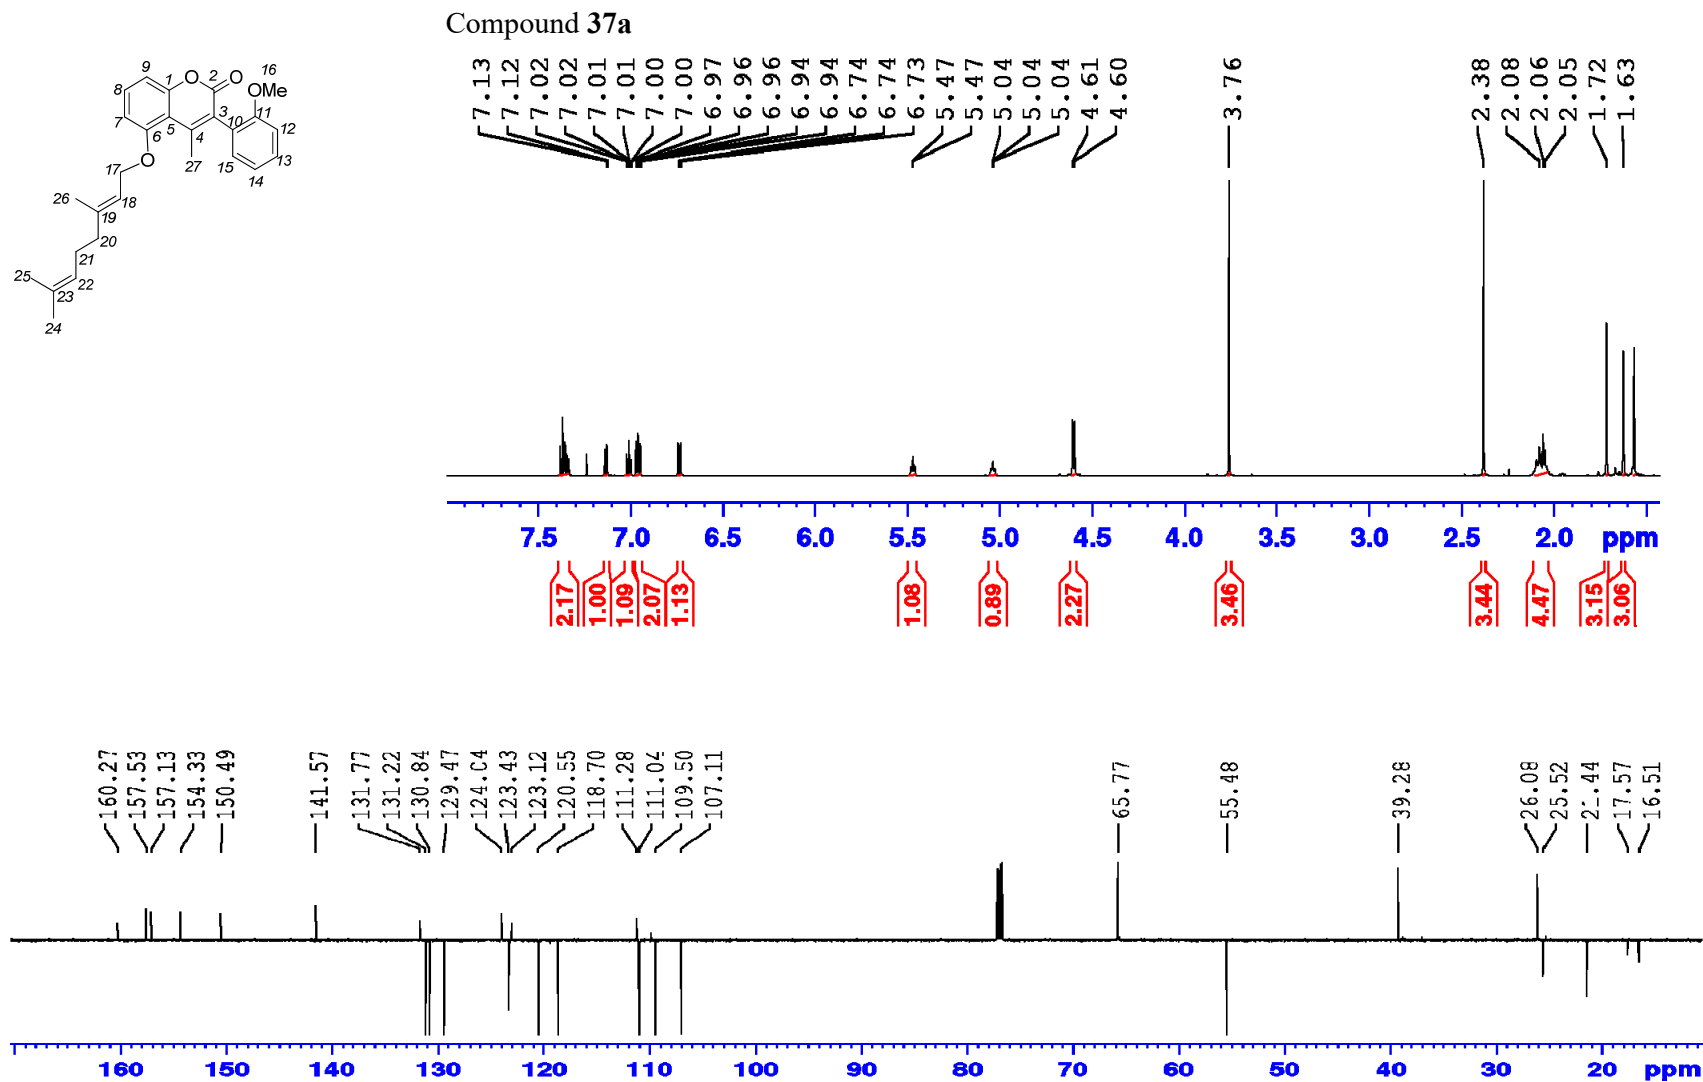

Compound **37b**

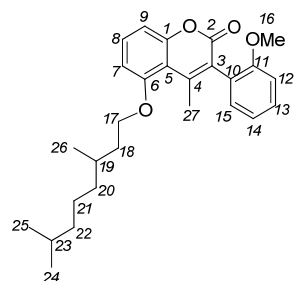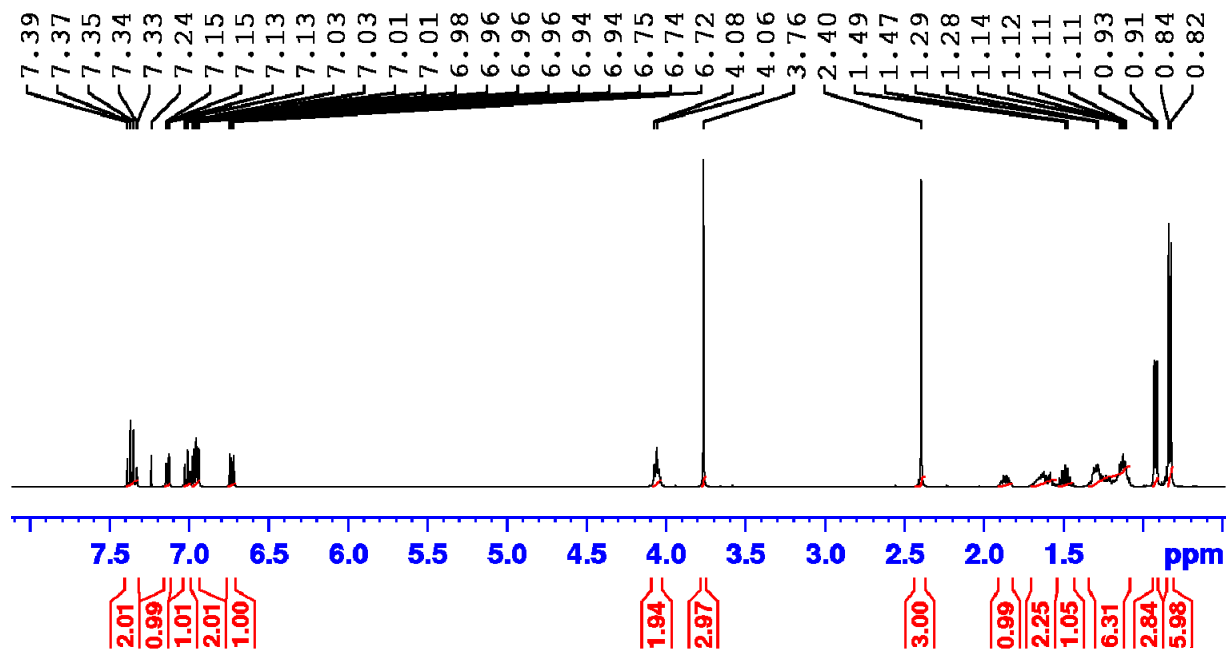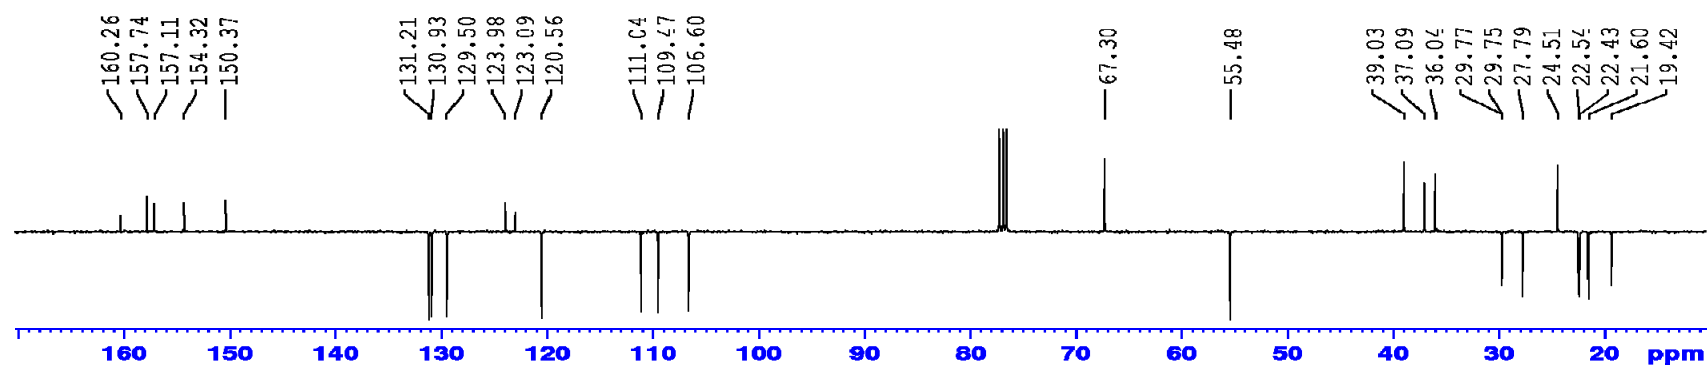

Compound **37c**

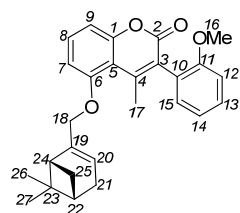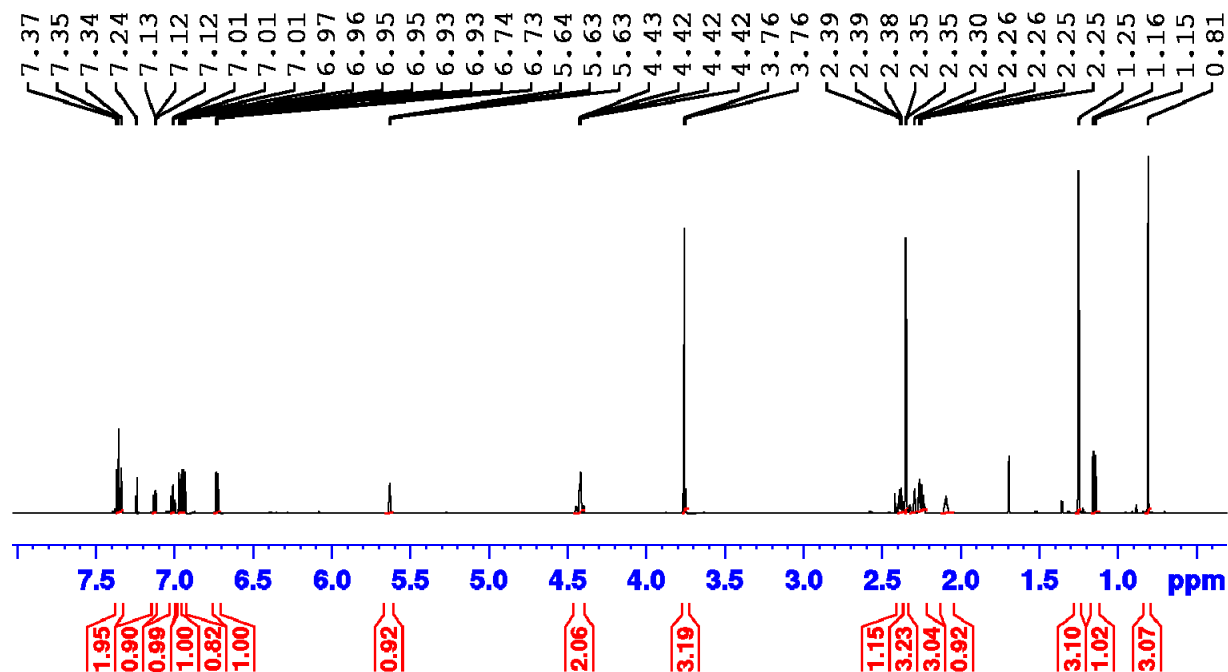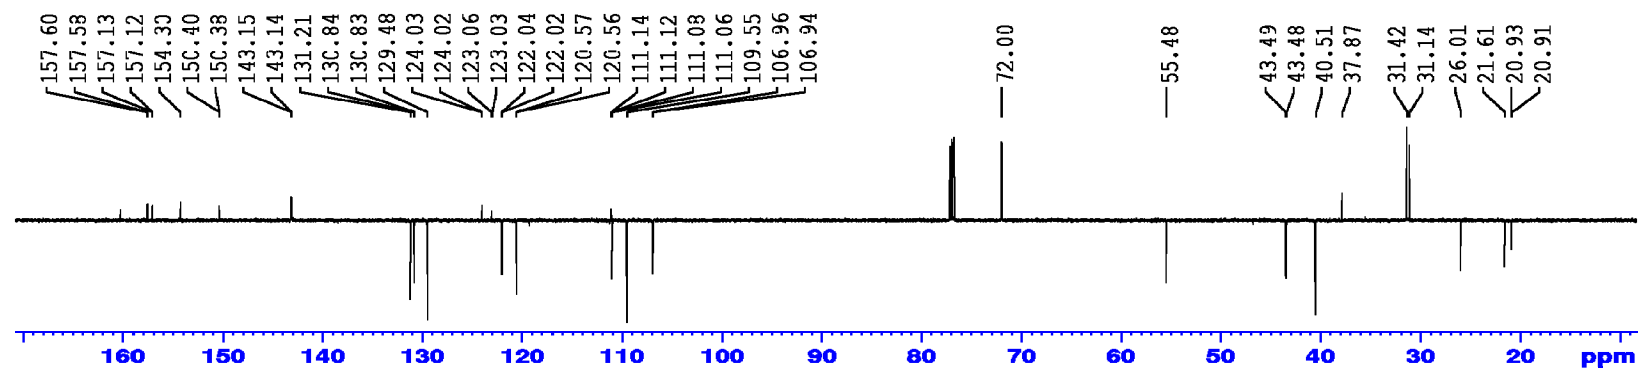

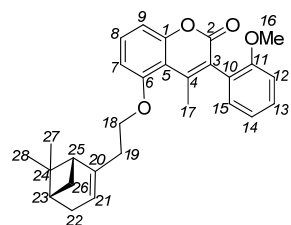

Compound **37d**

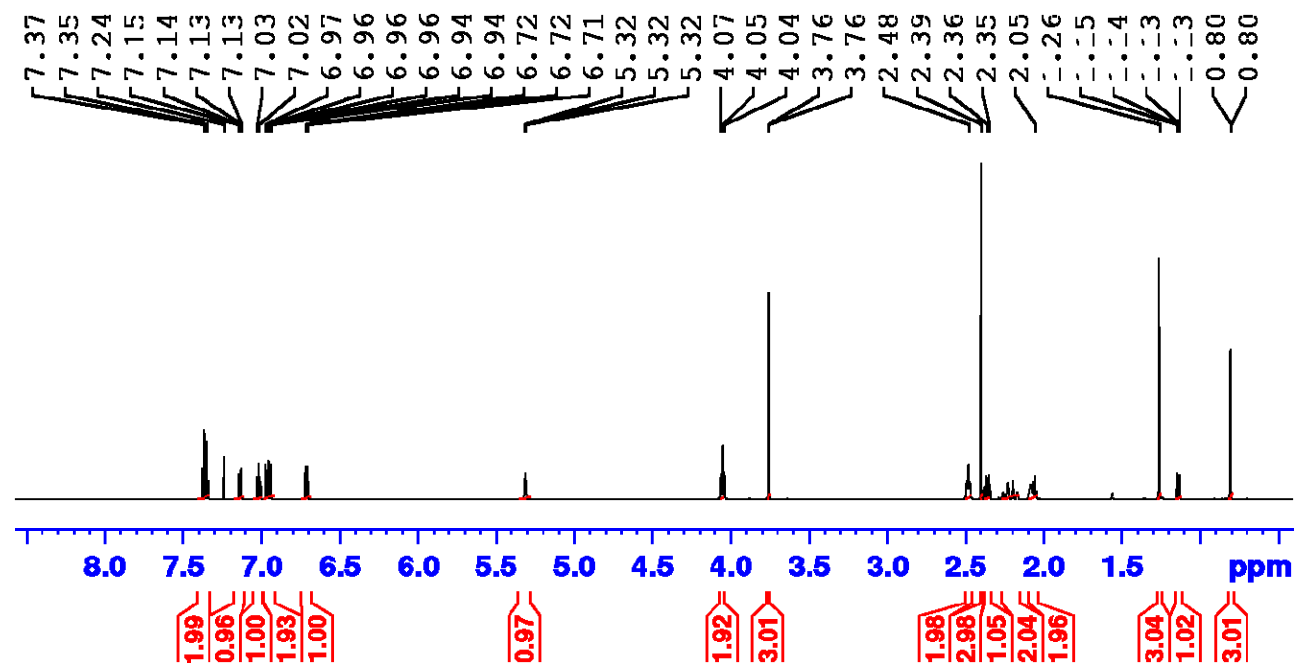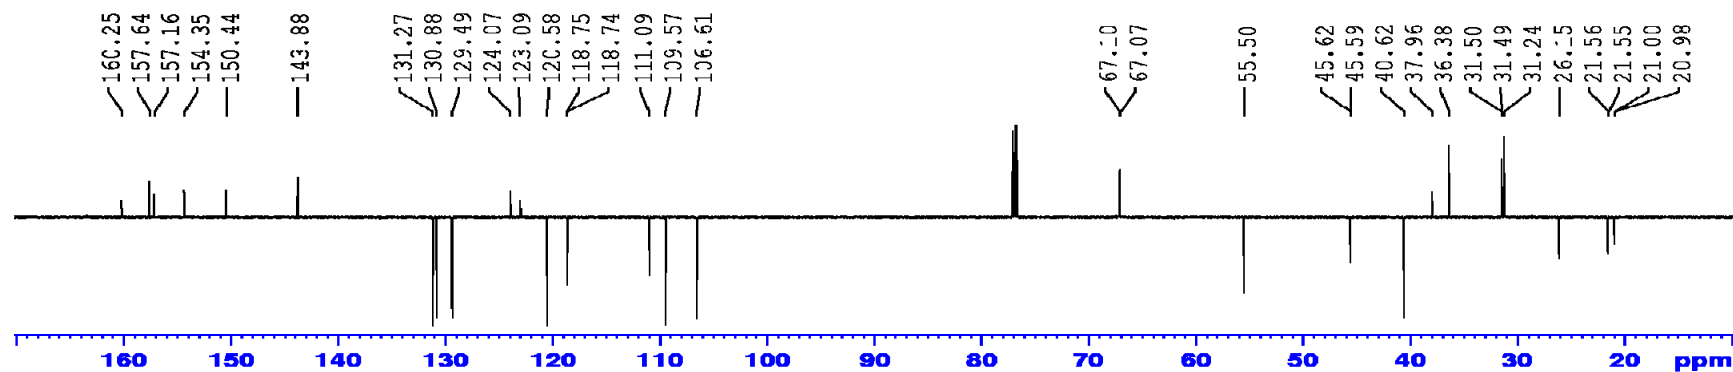

Compound **38a**

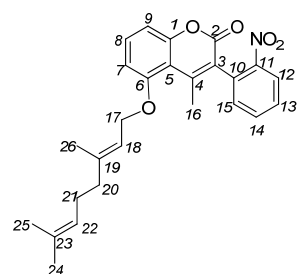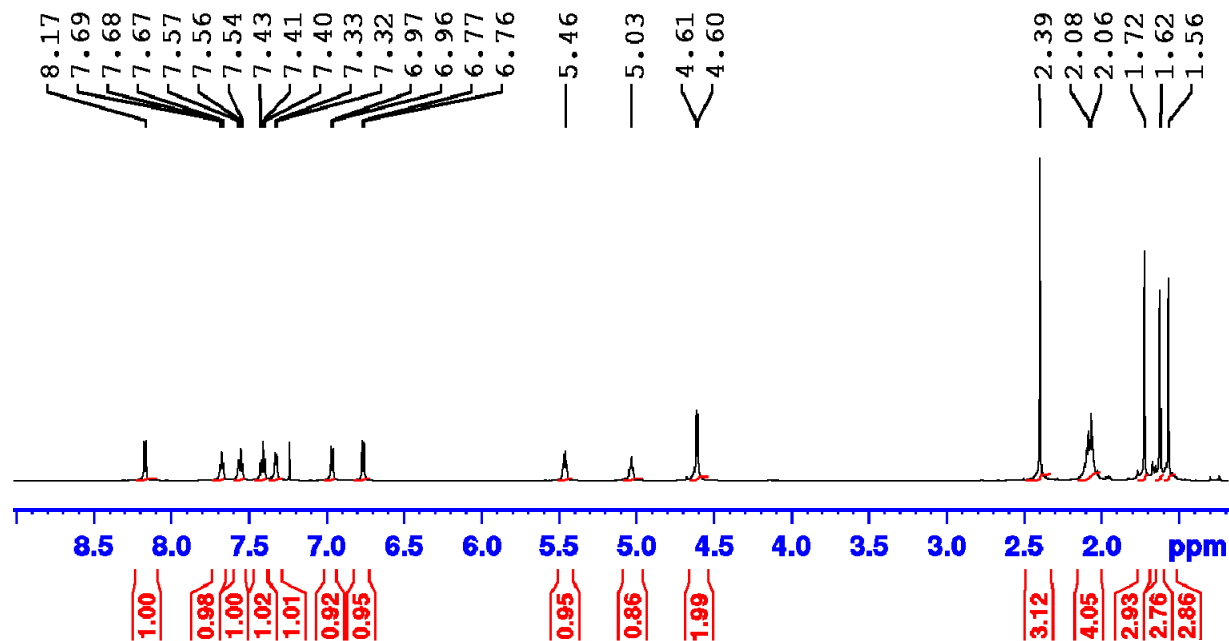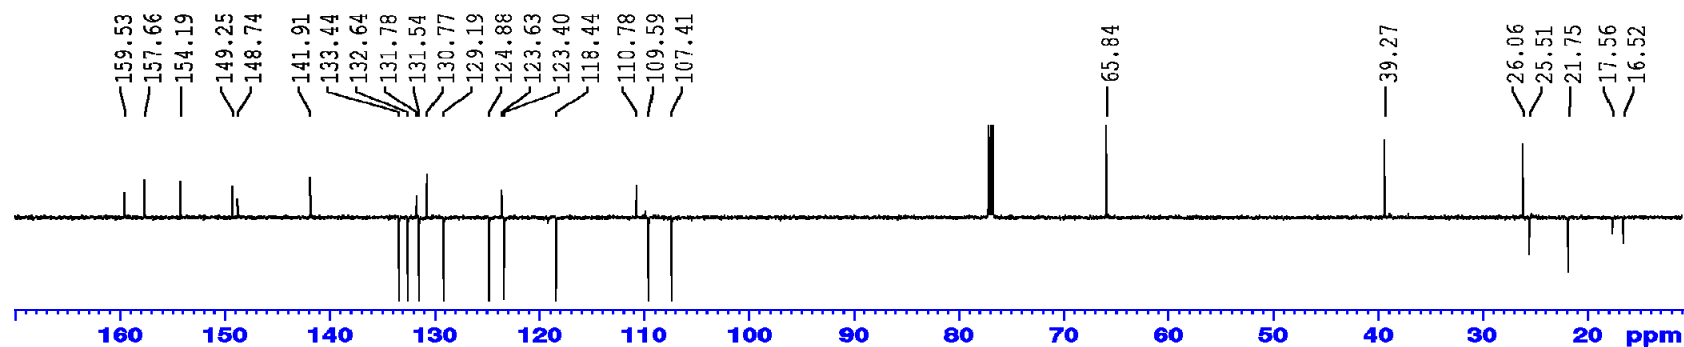

Compound **38b**

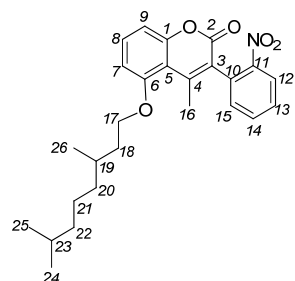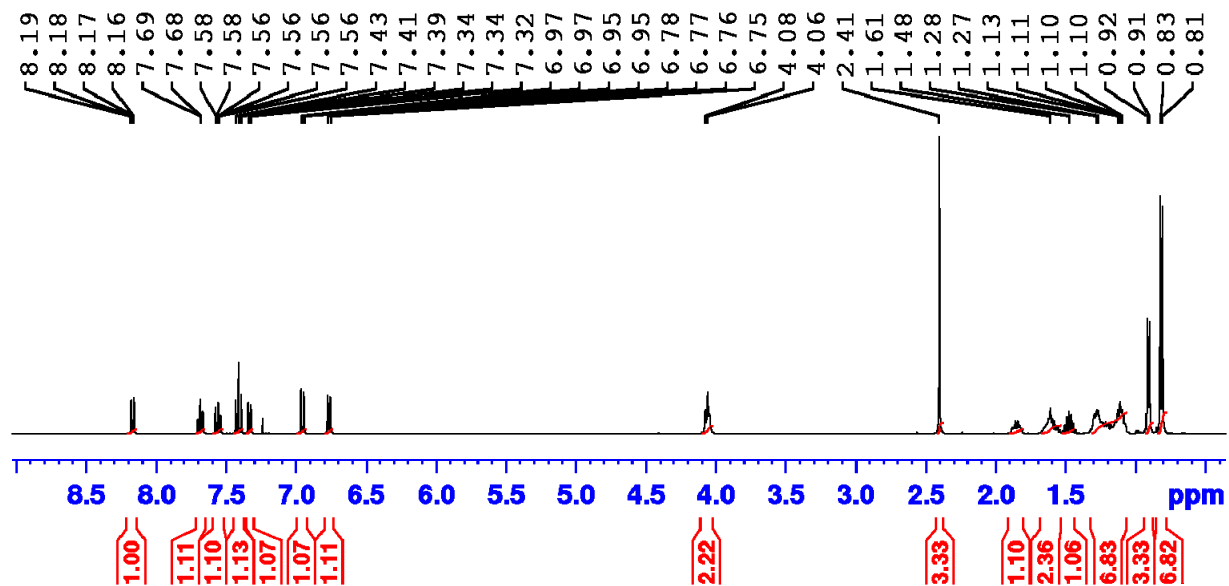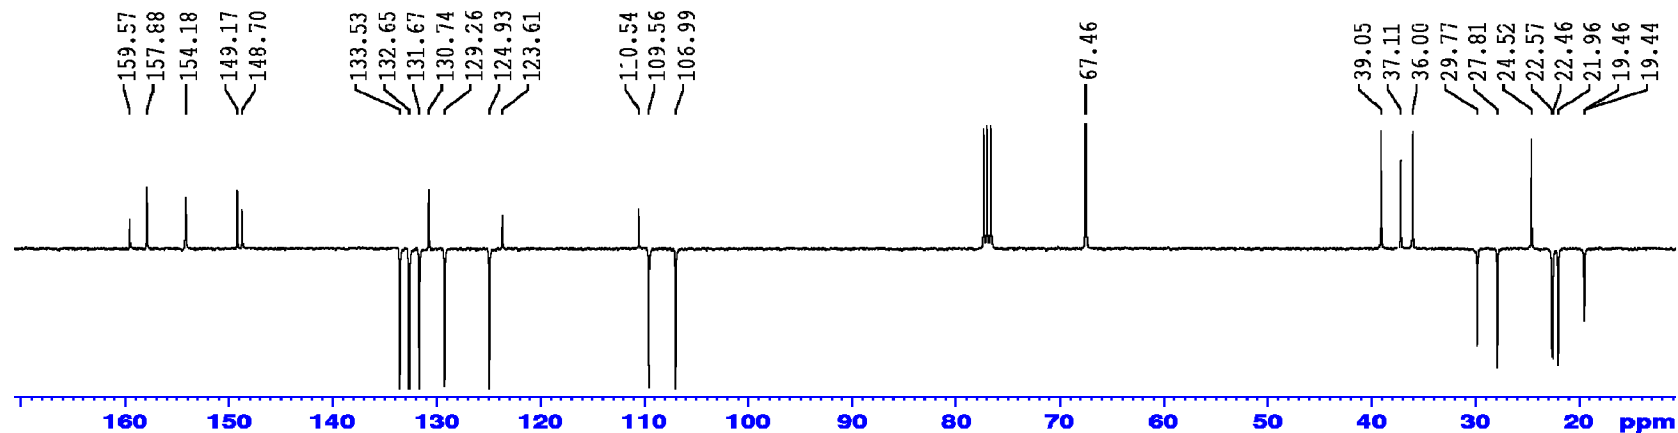

Compound **38c**

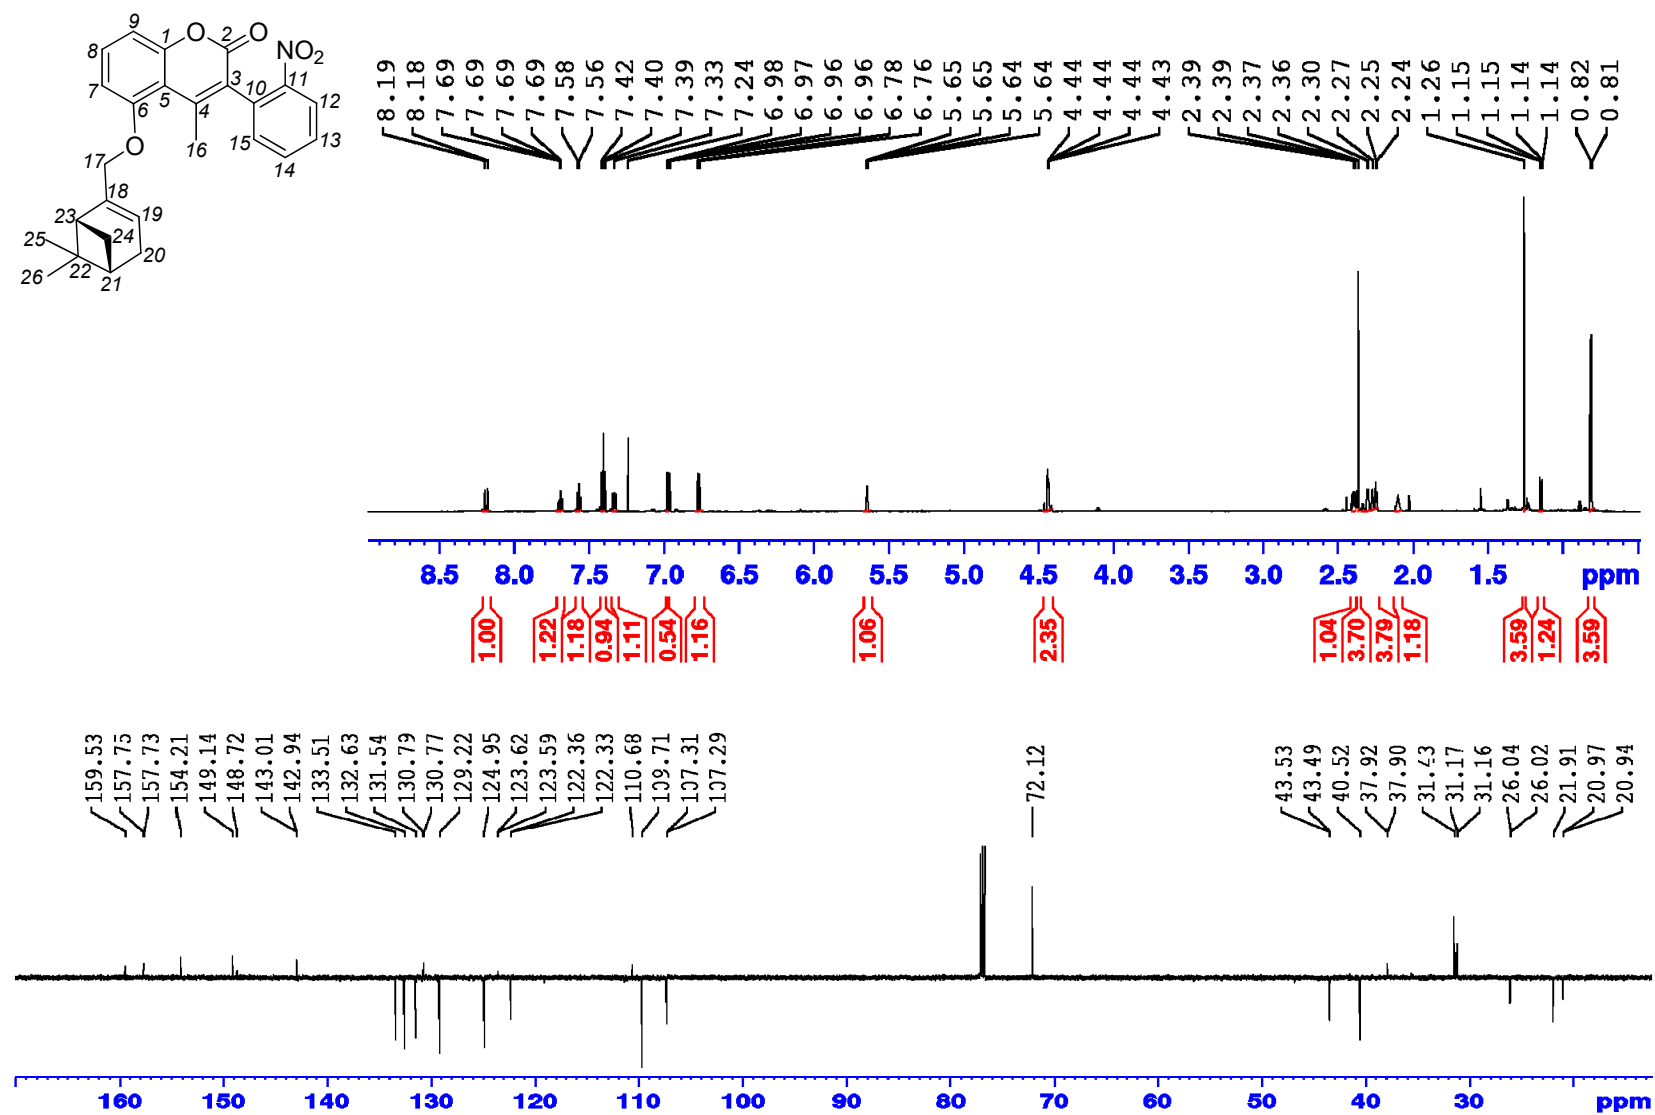



**Table S1.** The binding affinities as predicted by the scoring functions used to the catalytic Tdp1 binding pocket and their measured IC<sub>50</sub> values.

| Ligand     | ASP  | ChemPLP | CS   | GS   | IC <sub>50</sub> , $\mu$ M |
|------------|------|---------|------|------|----------------------------|
| <b>34a</b> | 39   | 62      | 27.1 | 58.4 | 1.06 $\pm$ 0.06            |
| <b>35a</b> | 35.9 | 60.8    | 26.1 | 57.2 | 6.63 $\pm$ 1.12            |
| <b>37a</b> | 40.7 | 66.2    | 28.6 | 55.2 | 1.22 $\pm$ 0.04            |
| <b>38a</b> | 40.9 | 61      | 25.5 | 52.1 | 1.03 $\pm$ 0.08            |
| <b>33a</b> | 38.9 | 65.1    | 26.1 | 55.4 | 0.13 $\pm$ 0.03            |
| <b>36a</b> | 35.9 | 63      | 28   | 61.6 | 0.85 $\pm$ 0.15            |
| <b>35c</b> | 37.6 | 54.7    | 27   | 47.3 | 1.14 $\pm$ 0.15            |
| <b>34c</b> | 34.8 | 54.3    | 26.8 | 47.6 | 0.9 $\pm$ 0.07             |
| <b>37c</b> | 37.7 | 55.5    | 26.9 | 53.6 | 0.79 $\pm$ 0.06            |
| <b>38c</b> | 37   | 54.4    | 27.2 | 53.5 | 3.83 $\pm$ 0.29            |
| <b>33c</b> | 37   | 54.6    | 26.5 | 49.8 | 5.25 $\pm$ 0.04            |
| <b>36c</b> | 35.9 | 54.1    | 29   | 53.3 | 4.36 $\pm$ 1.14            |
| <b>37d</b> | 42.8 | 60      | 31.1 | 52.4 | 3.93 $\pm$ 0.77            |
| <b>33b</b> | 39.2 | 62.3    | 25.3 | 52.9 | 0.29 $\pm$ 0.07            |
| <b>35b</b> | 38.3 | 63.2    | 25.3 | 58.2 | 0.37 $\pm$ 0.16            |
| <b>36b</b> | 36.5 | 58.1    | 28.4 | 56.3 | $\geq$ 50                  |
| <b>37b</b> | 39.8 | 61.2    | 28.2 | 56.4 | 2.60 $\pm$ 0.35            |
| <b>38b</b> | 41.2 | 62.7    | 28.0 | 58.3 | 2.18 $\pm$ 0.13            |
| <b>33d</b> | 36.8 | 57.6    | 27.7 | 52.6 | 2.51 $\pm$ 0.14            |

**Table S2.** The molecular descriptors and their corresponding Known Drug Indexes 2a and 2b (KDI<sub>2a/2b</sub>).

|            | <b>RB</b> | <b>MW</b> | <b>HD</b> | <b>HA</b> | <b>Log<br/>P</b> | <b>PSA</b> | <b>KDI<sub>2A</sub></b> | <b>KDI<sub>2B</sub></b> | <b>IC<sub>50</sub>, <math>\mu</math>M</b> |
|------------|-----------|-----------|-----------|-----------|------------------|------------|-------------------------|-------------------------|-------------------------------------------|
| <b>34a</b> | 8         | 418.5     | 0         | 4         | 6.8              | 44.8       | 3.92                    | 0.04                    | 1.06±0.06                                 |
| <b>35a</b> | 8         | 433.5     | 0         | 4.25      | 6.0              | 79.0       | 4.25                    | 0.09                    | 6.63±1.12                                 |
| <b>37a</b> | 7         | 406.5     | 0         | 3.25      | 6.7              | 36.1       | 3.90                    | 0.04                    | 1.22±0.04                                 |
| <b>38a</b> | 7         | 467.4     | 0         | 3.25      | 7.1              | 40.2       | 3.63                    | 0.02                    | 1.03±0.08                                 |
| <b>33a</b> | 5         | 416.5     | 0         | 4         | 6.0              | 46.9       | 4.48                    | 0.12                    | 0.13±0.03                                 |
| <b>36a</b> | 4         | 465.4     | 0         | 3.25      | 6.5              | 39.4       | 3.95                    | 0.05                    | 0.85±0.15                                 |
| <b>35c</b> | 5         | 416.5     | 0         | 4         | 6.1              | 44.5       | 4.44                    | 0.11                    | 1.14±0.15                                 |
| <b>34c</b> | 5         | 431.5     | 0         | 4.25      | 5.3              | 78.6       | 4.81                    | 0.22                    | 0.9±0.07                                  |
| <b>37c</b> | 4         | 404.5     | 0         | 3.25      | 6.2              | 39.4       | 4.26                    | 0.09                    | 0.79±0.06                                 |
| <b>38c</b> | 4         | 465.4     | 0         | 3.25      | 6.4              | 39.4       | 3.96                    | 0.05                    | 3.83±0.29                                 |
| <b>33c</b> | 6         | 430.5     | 0         | 4         | 6.4              | 44.6       | 4.24                    | 0.08                    | 5.25±0.04                                 |
| <b>36c</b> | 9         | 410.5     | 0         | 3.25      | 7.0              | 39.6       | 3.55                    | 0.02                    | 4.36±1.14                                 |
| <b>37d</b> | 10        | 422.6     | 0         | 4         | 6.8              | 47.0       | 3.60                    | 0.02                    | 3.93±0.77                                 |
| <b>33b</b> | 7         | 467.4     | 0         | 3.25      | 7.0              | 36.1       | 3.59                    | 0.02                    | 0.29±0.07                                 |
| <b>35b</b> | 8         | 418.5     | 0         | 4         | 6.7              | 47.0       | 3.95                    | 0.05                    | 0.37±0.16                                 |
| <b>36b</b> | 9         | 457.4     | 0         | 3.25      | 6.9              | 44.4       | 3.41                    | 0.02                    | ≥50                                       |
| <b>37b</b> | 10        | 408.5     | 0         | 4         | 6.6              | 48.8       | 3.71                    | 0.03                    | 2.60±0.35                                 |
| <b>38b</b> | 10        | 423.5     | 0         | 4.25      | 5.8              | 83.2       | 4.01                    | 0.05                    | 2.18±0.13                                 |
| <b>33d</b> | 5         | 404.5     | 0         | 3.25      | 6.2              | 43.2       | 4.28                    | 0.09                    | 2.51±0.14                                 |

**Table S3.** Definition of lead-like, drug-like and Known Drug Space (KDS) in terms of molecular descriptors. The values given are the maxima for each descriptor for the volumes of chemical space used.

|                                            | <b>Lead-like<br/>Space</b> | <b>Drug-like<br/>Space</b> | <b>Known<br/>Drug Space</b> |
|--------------------------------------------|----------------------------|----------------------------|-----------------------------|
| Molecular weight (g mol <sup>-1</sup> )    | 300                        | 500                        | 800                         |
| Lipophilicity (Log P)                      | 3                          | 5                          | 6.5                         |
| Hydrogen bond donors (HD)                  | 3                          | 5                          | 7                           |
| Hydrogen bond acceptors (HA)               | 3                          | 10                         | 15                          |
| Polar surface area (Å <sup>2</sup> ) (PSA) | 60                         | 140                        | 180                         |
| Rotatable bonds (RB)                       | 3                          | 10                         | 17                          |
